# Supplementary material
Source: PubMed Central journal article supplement (PMC4917298)

# Supplementary Figure 1a, b, c

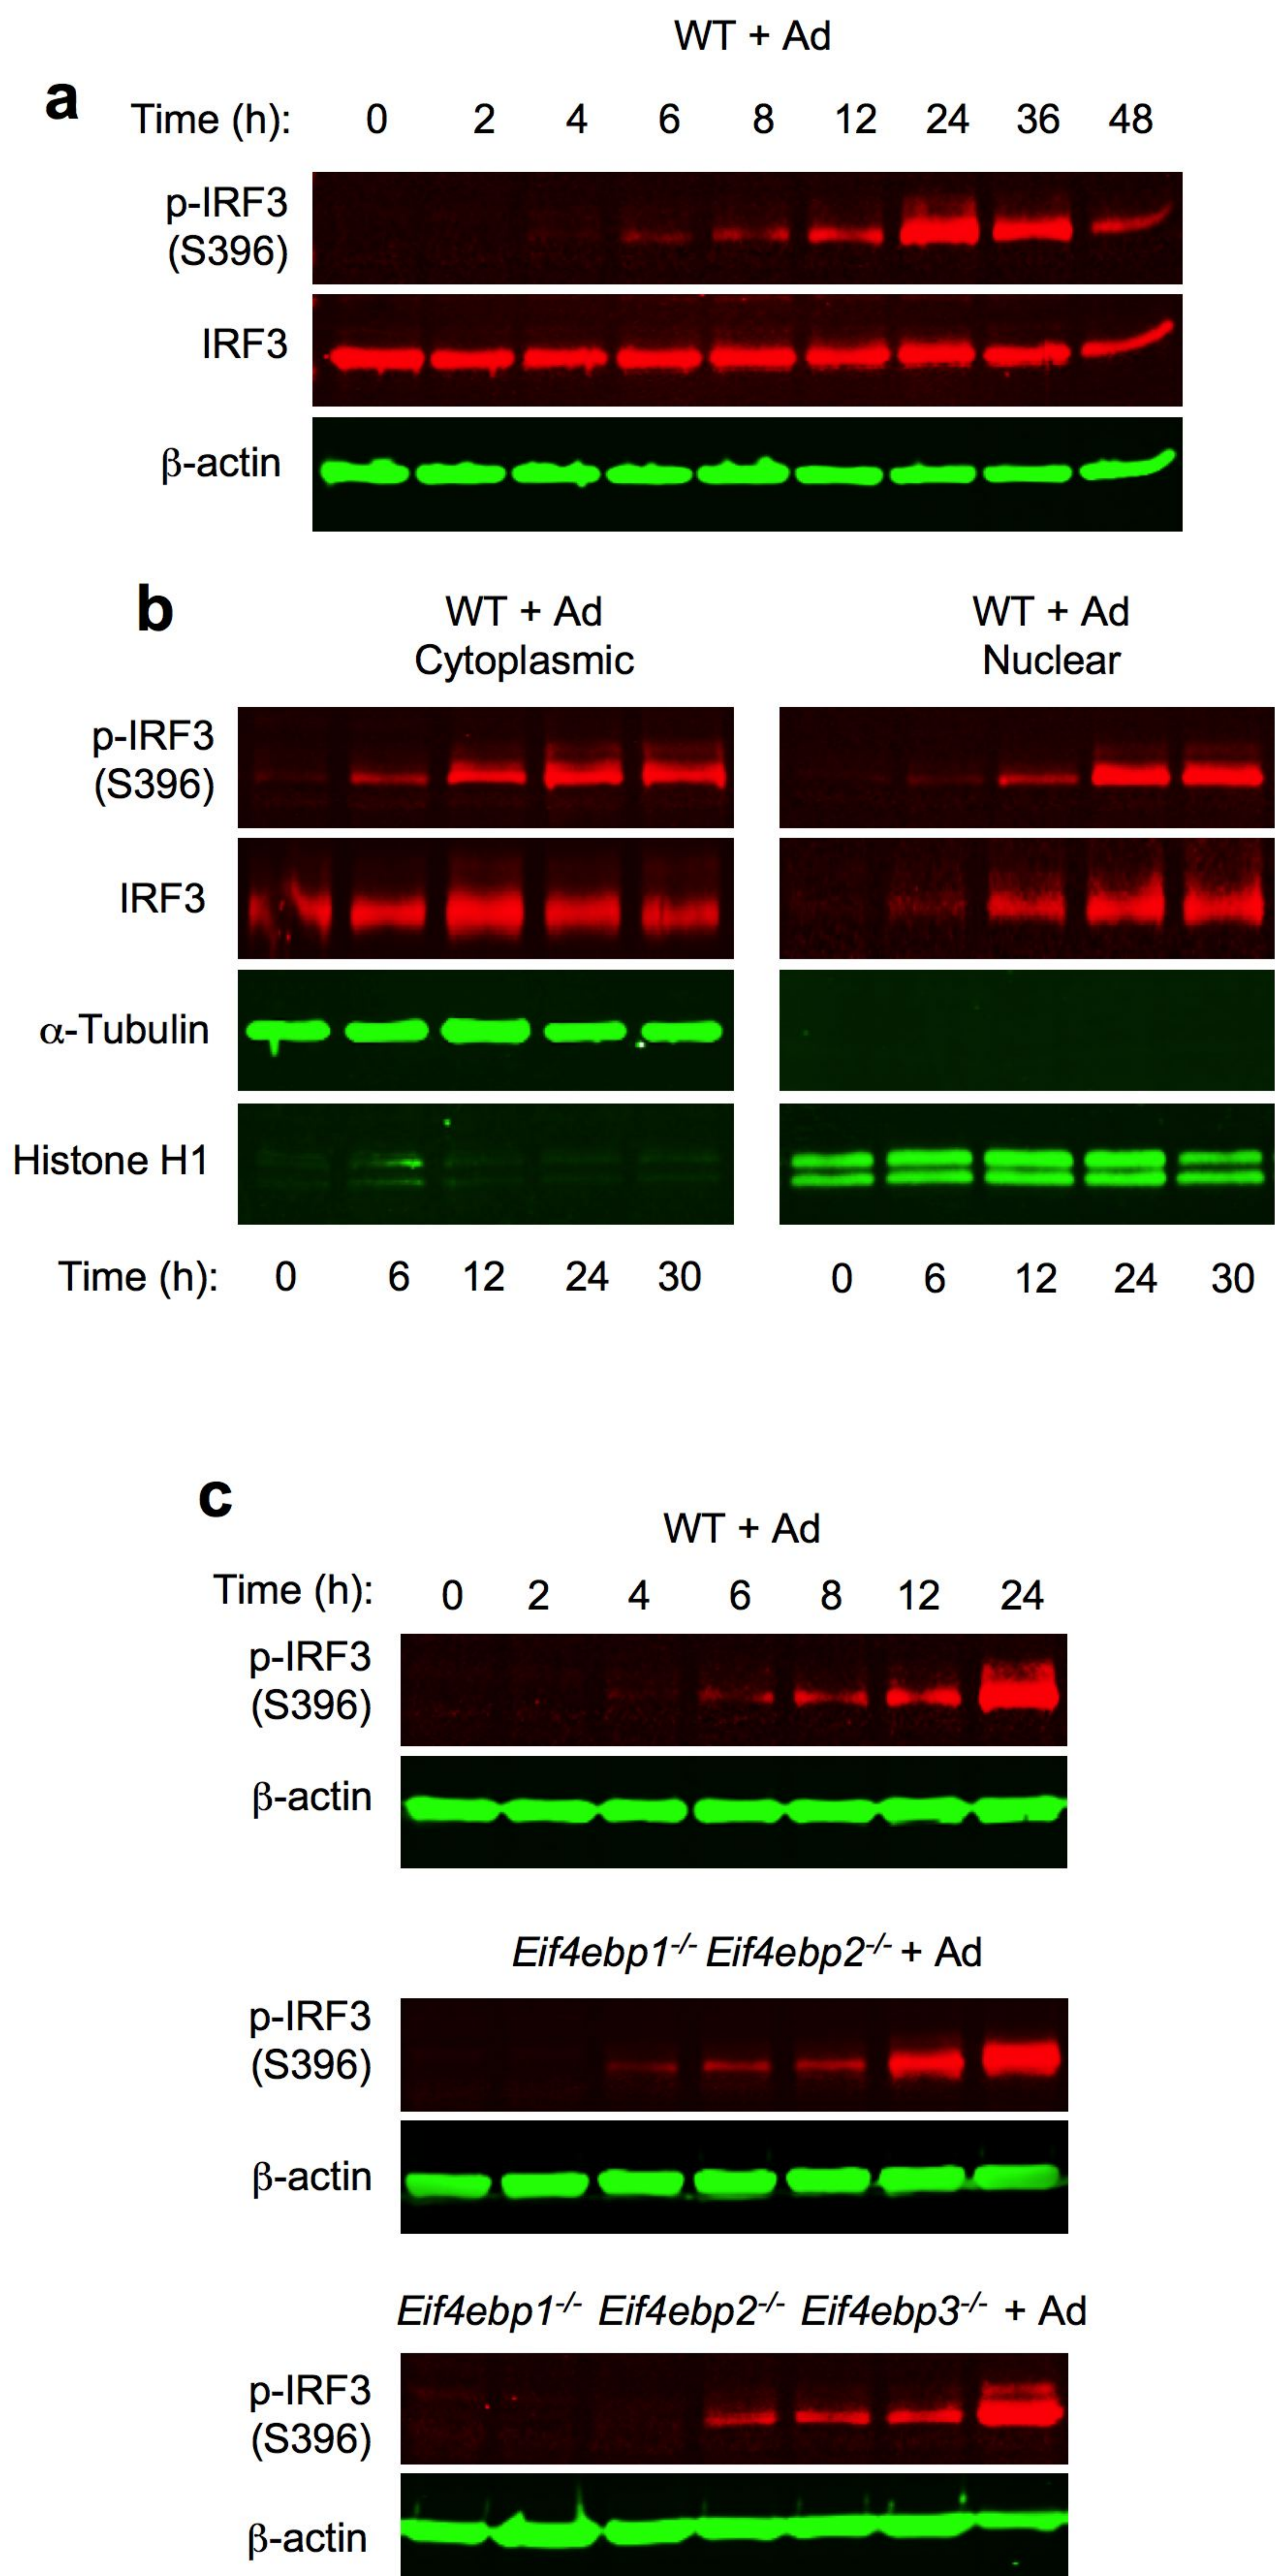

# Supplementary Figure 2a, b, c

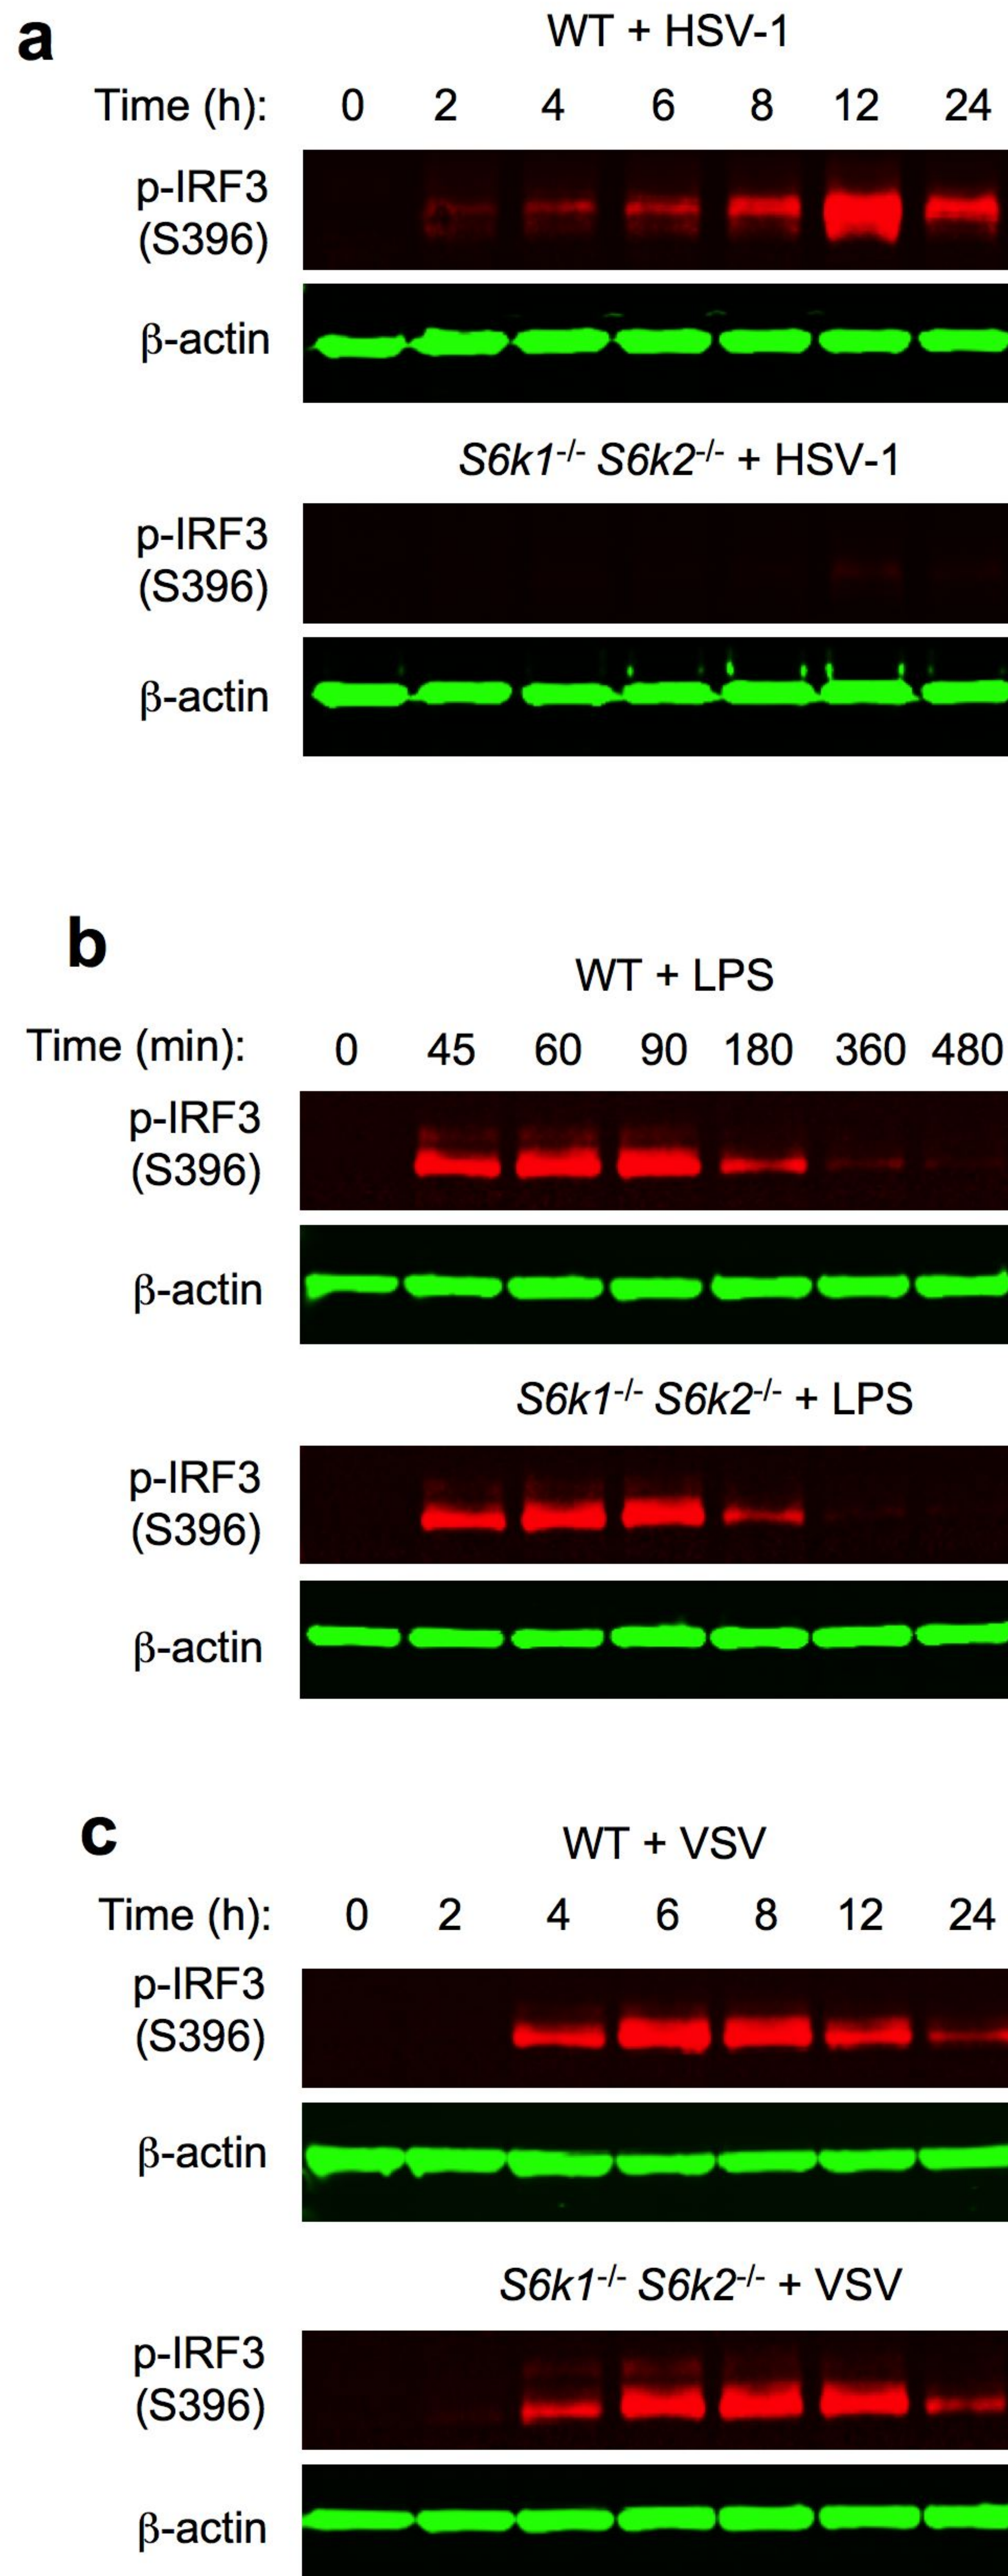

**Supplementary Figure 3a, b, c, d, e, f**

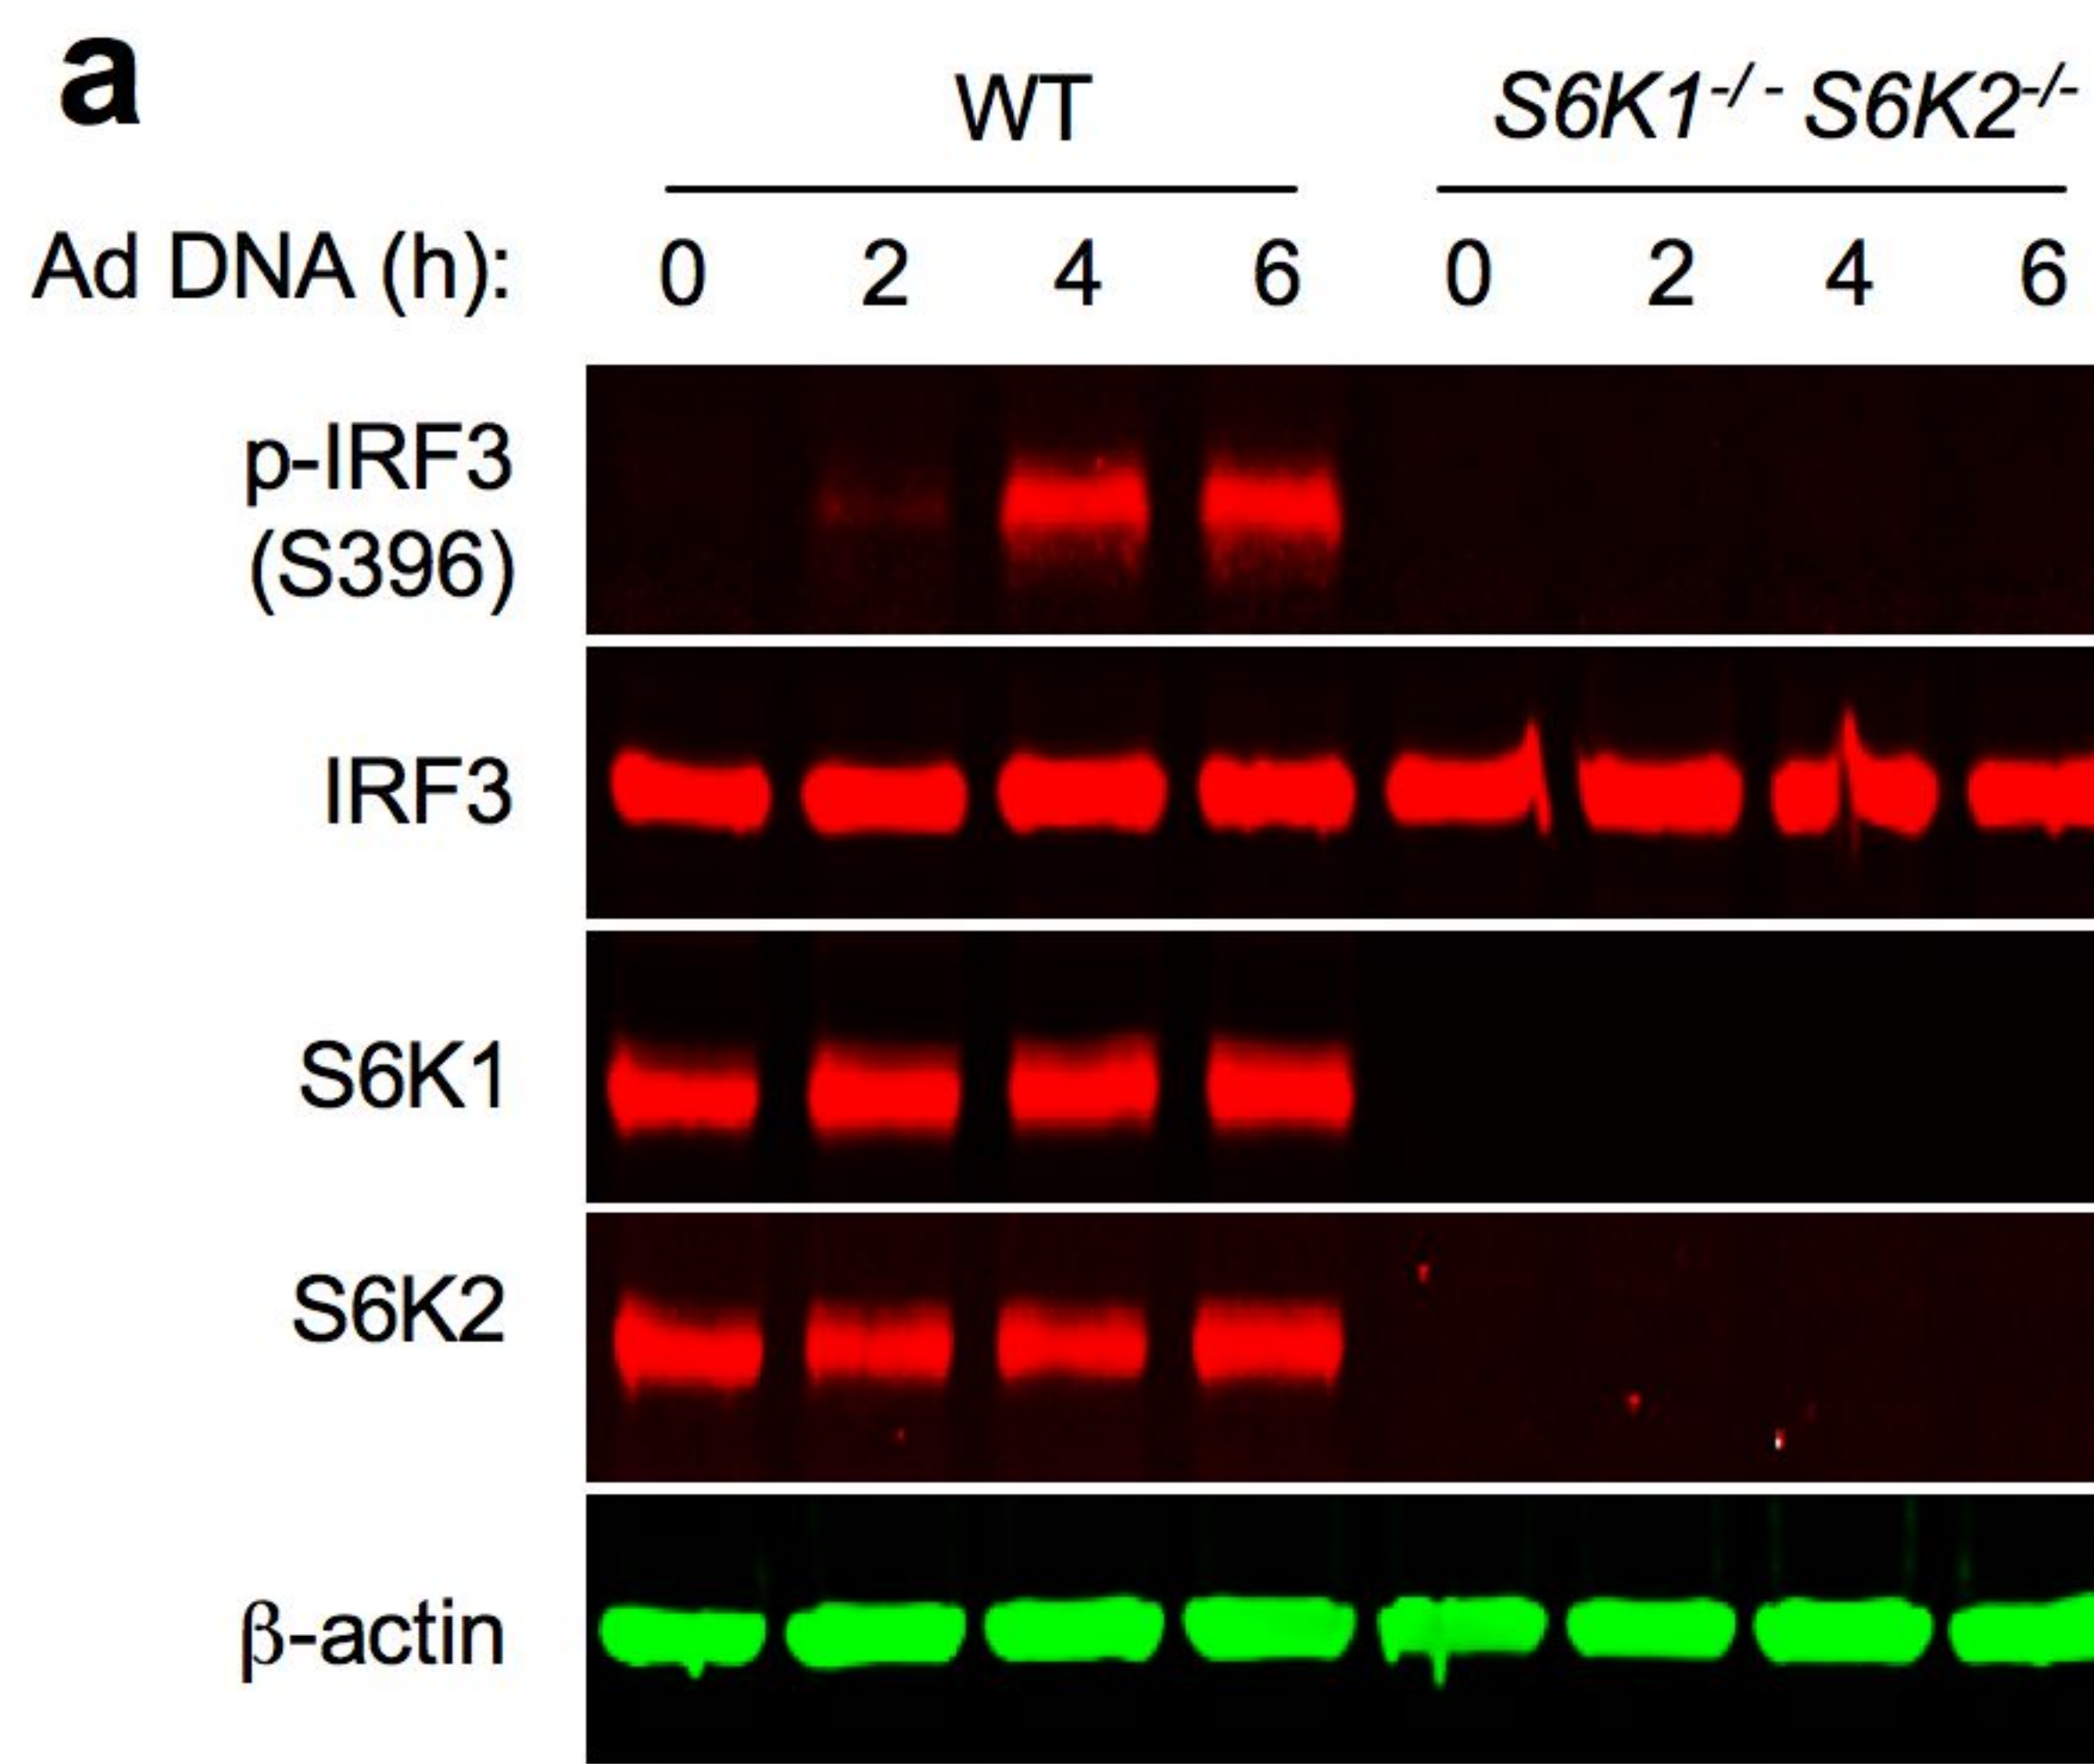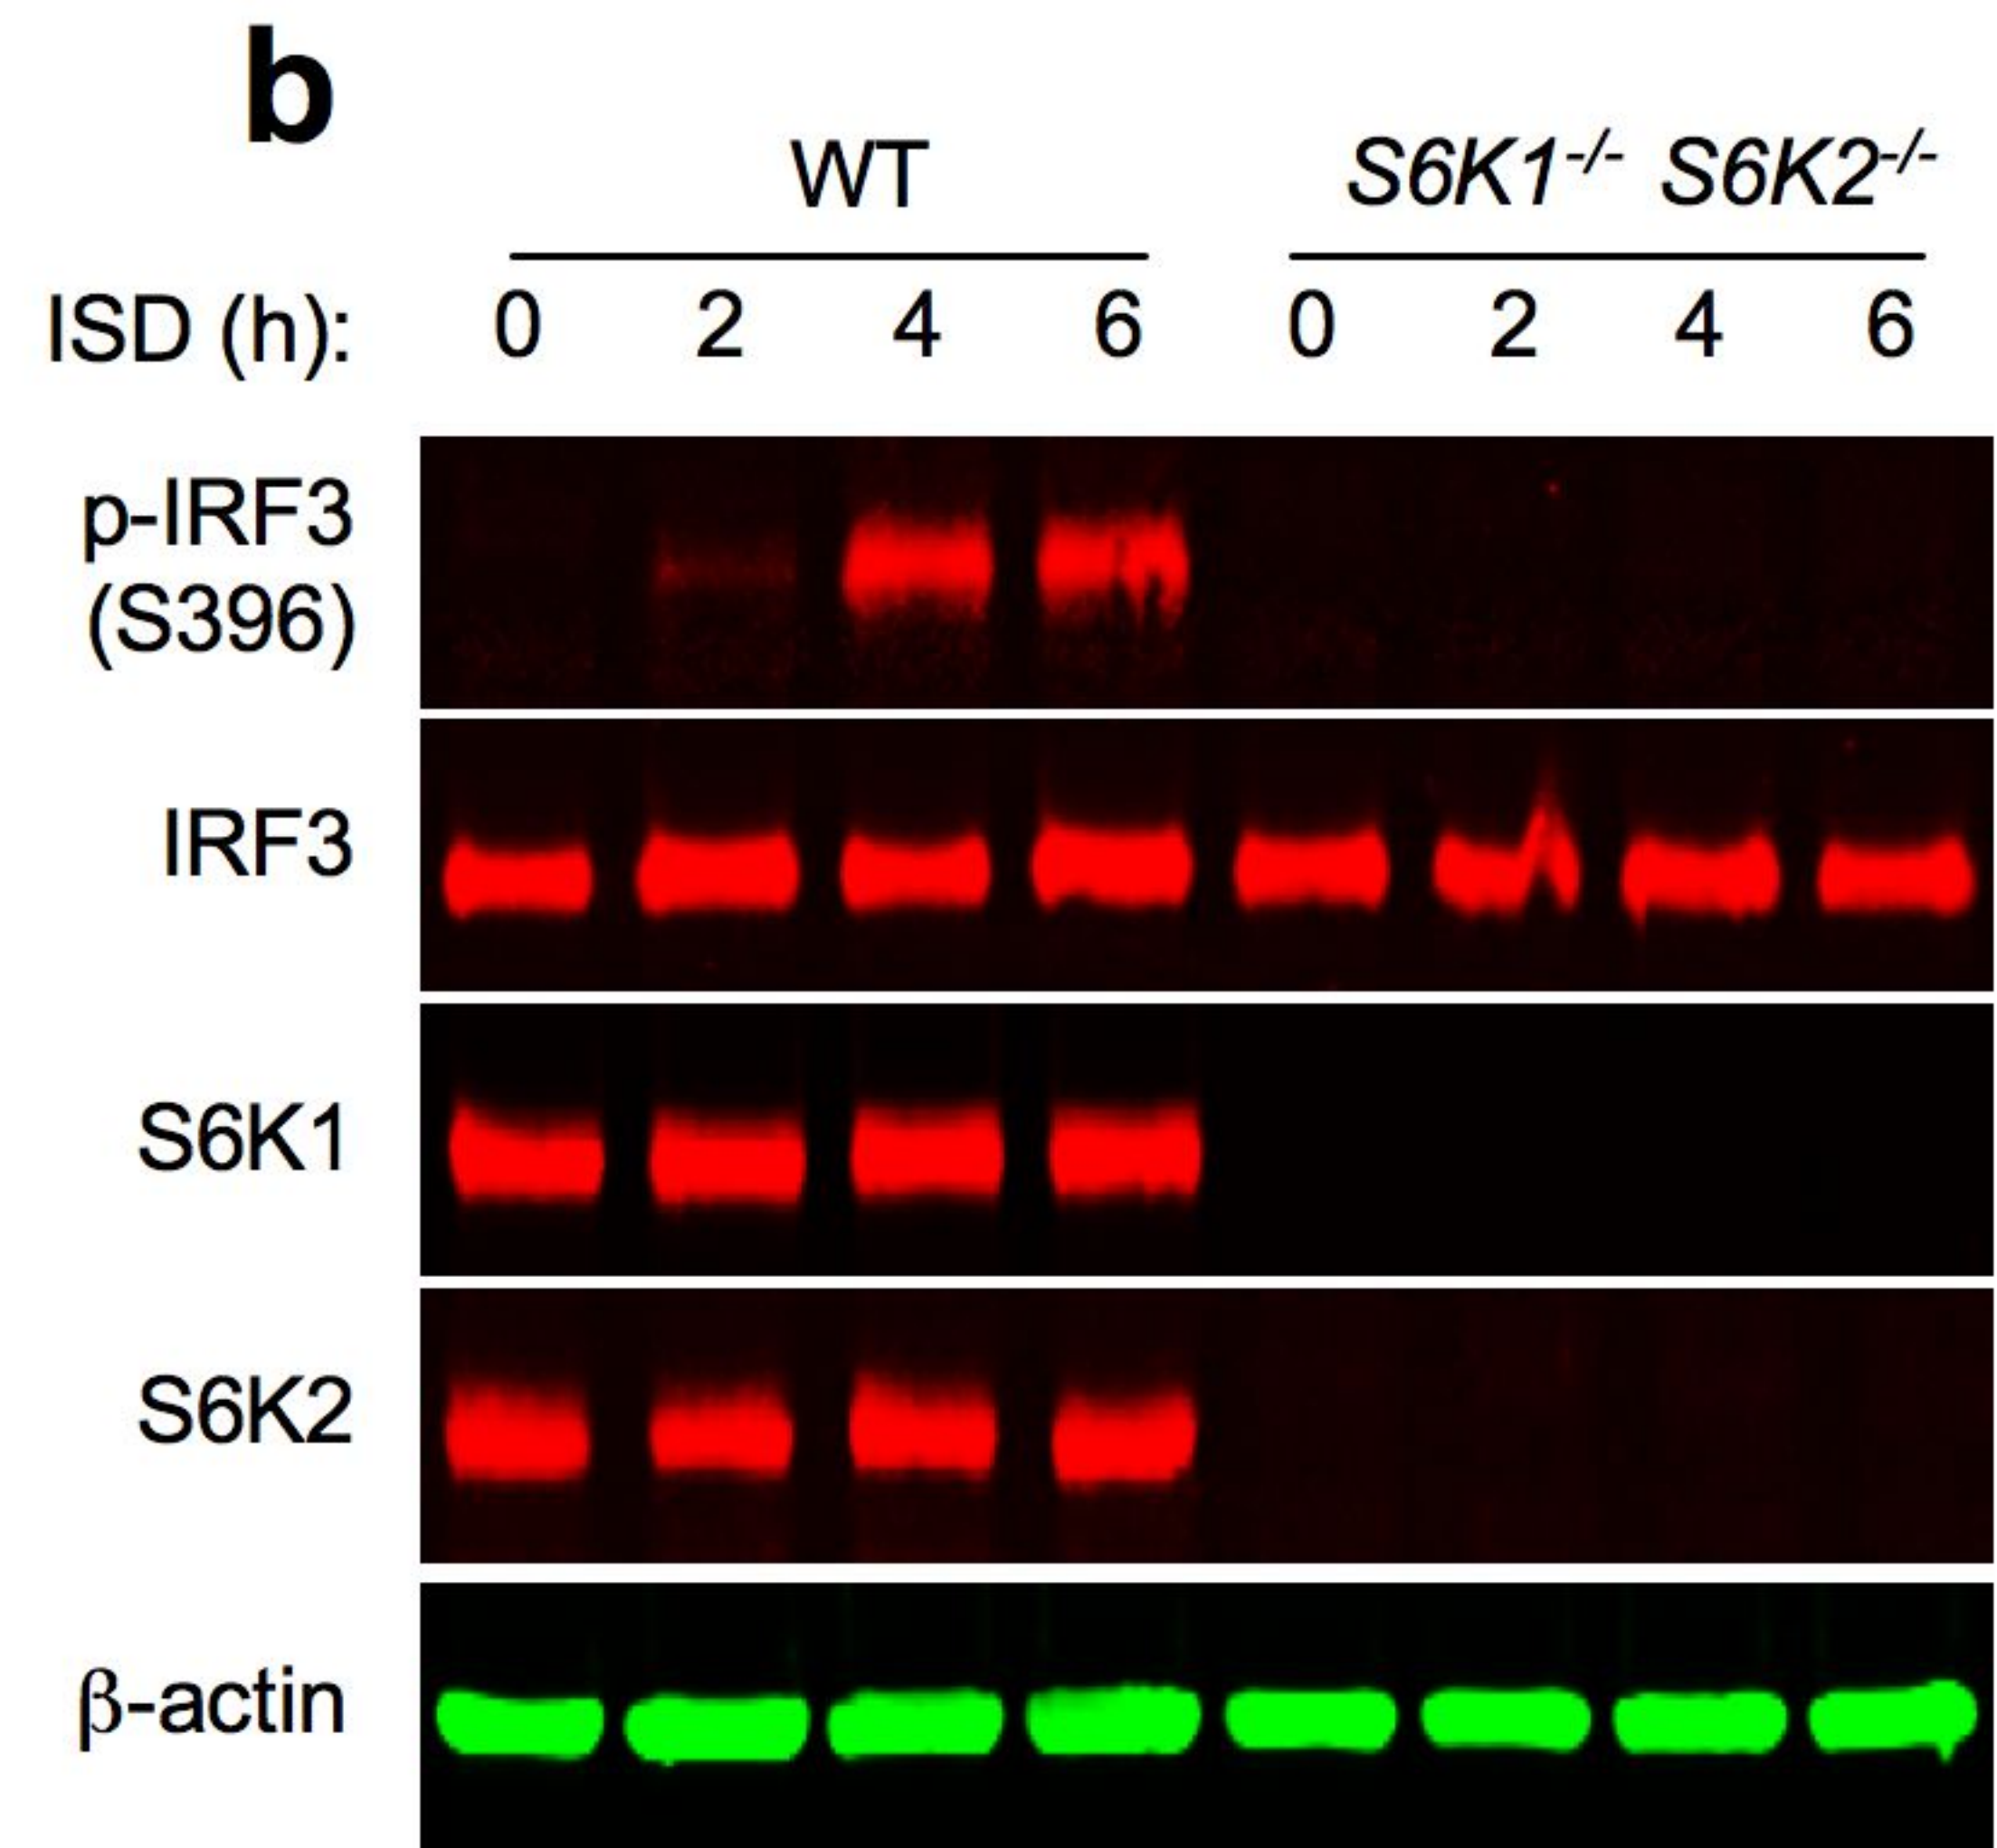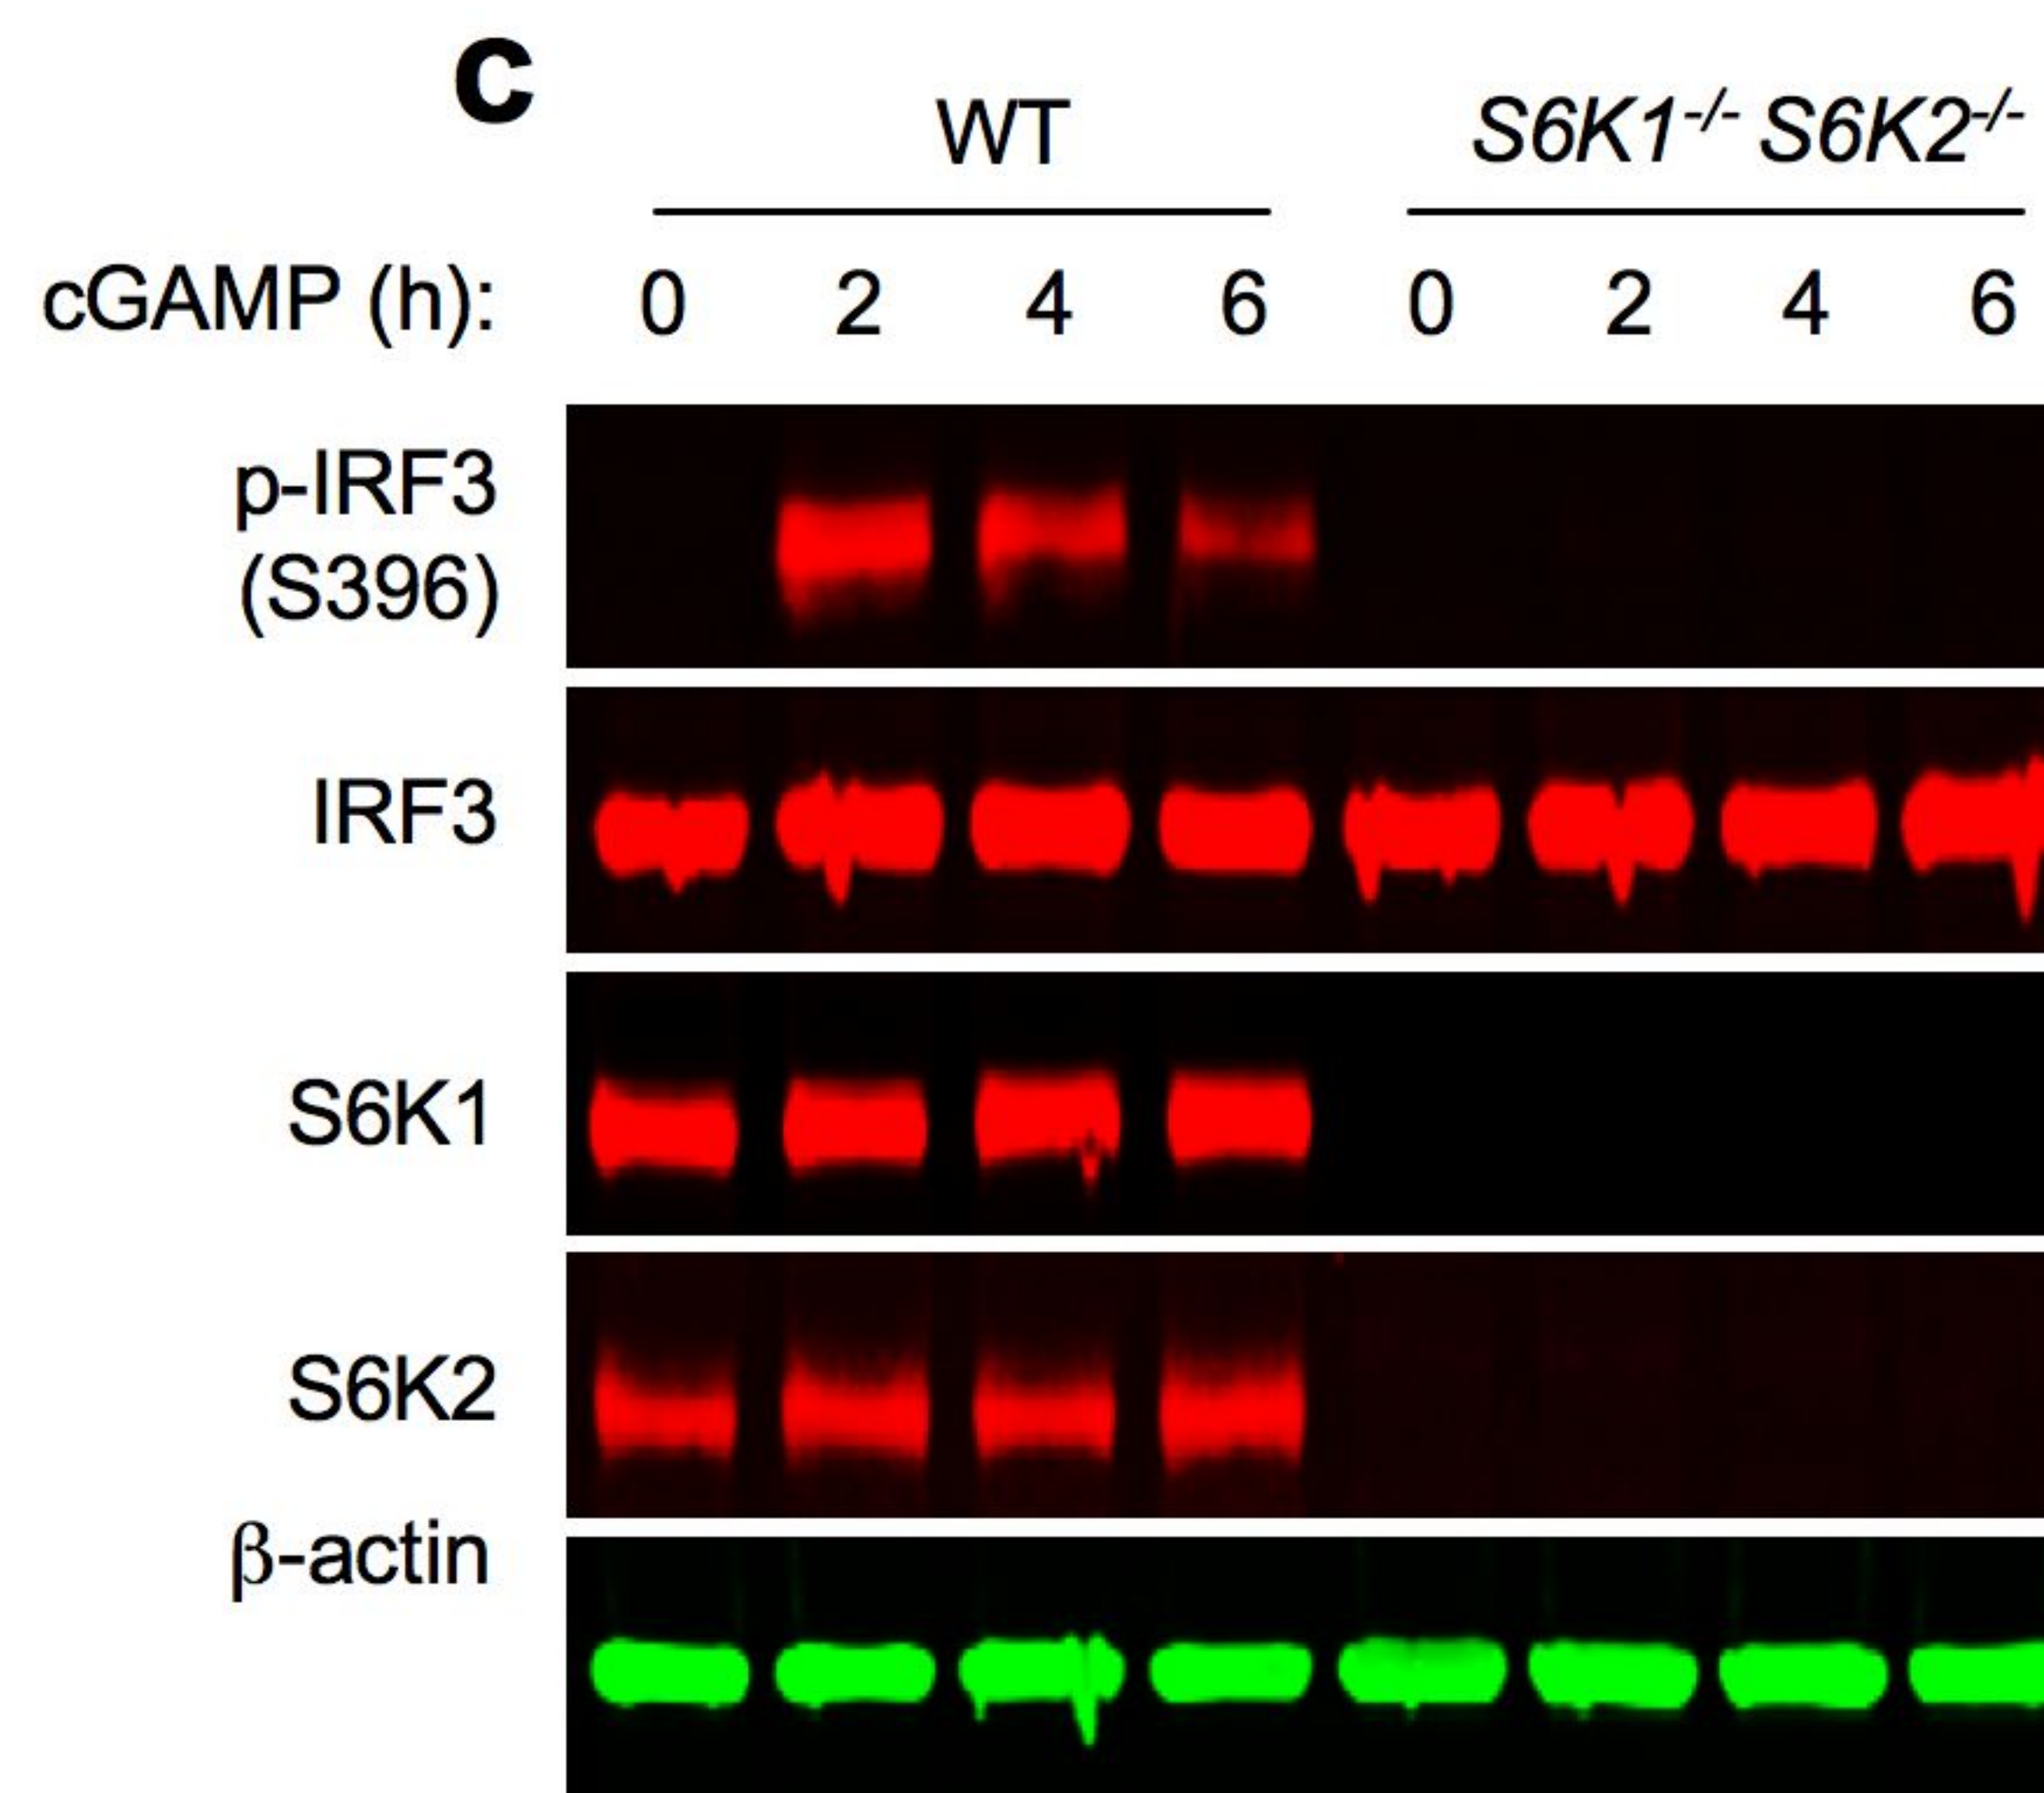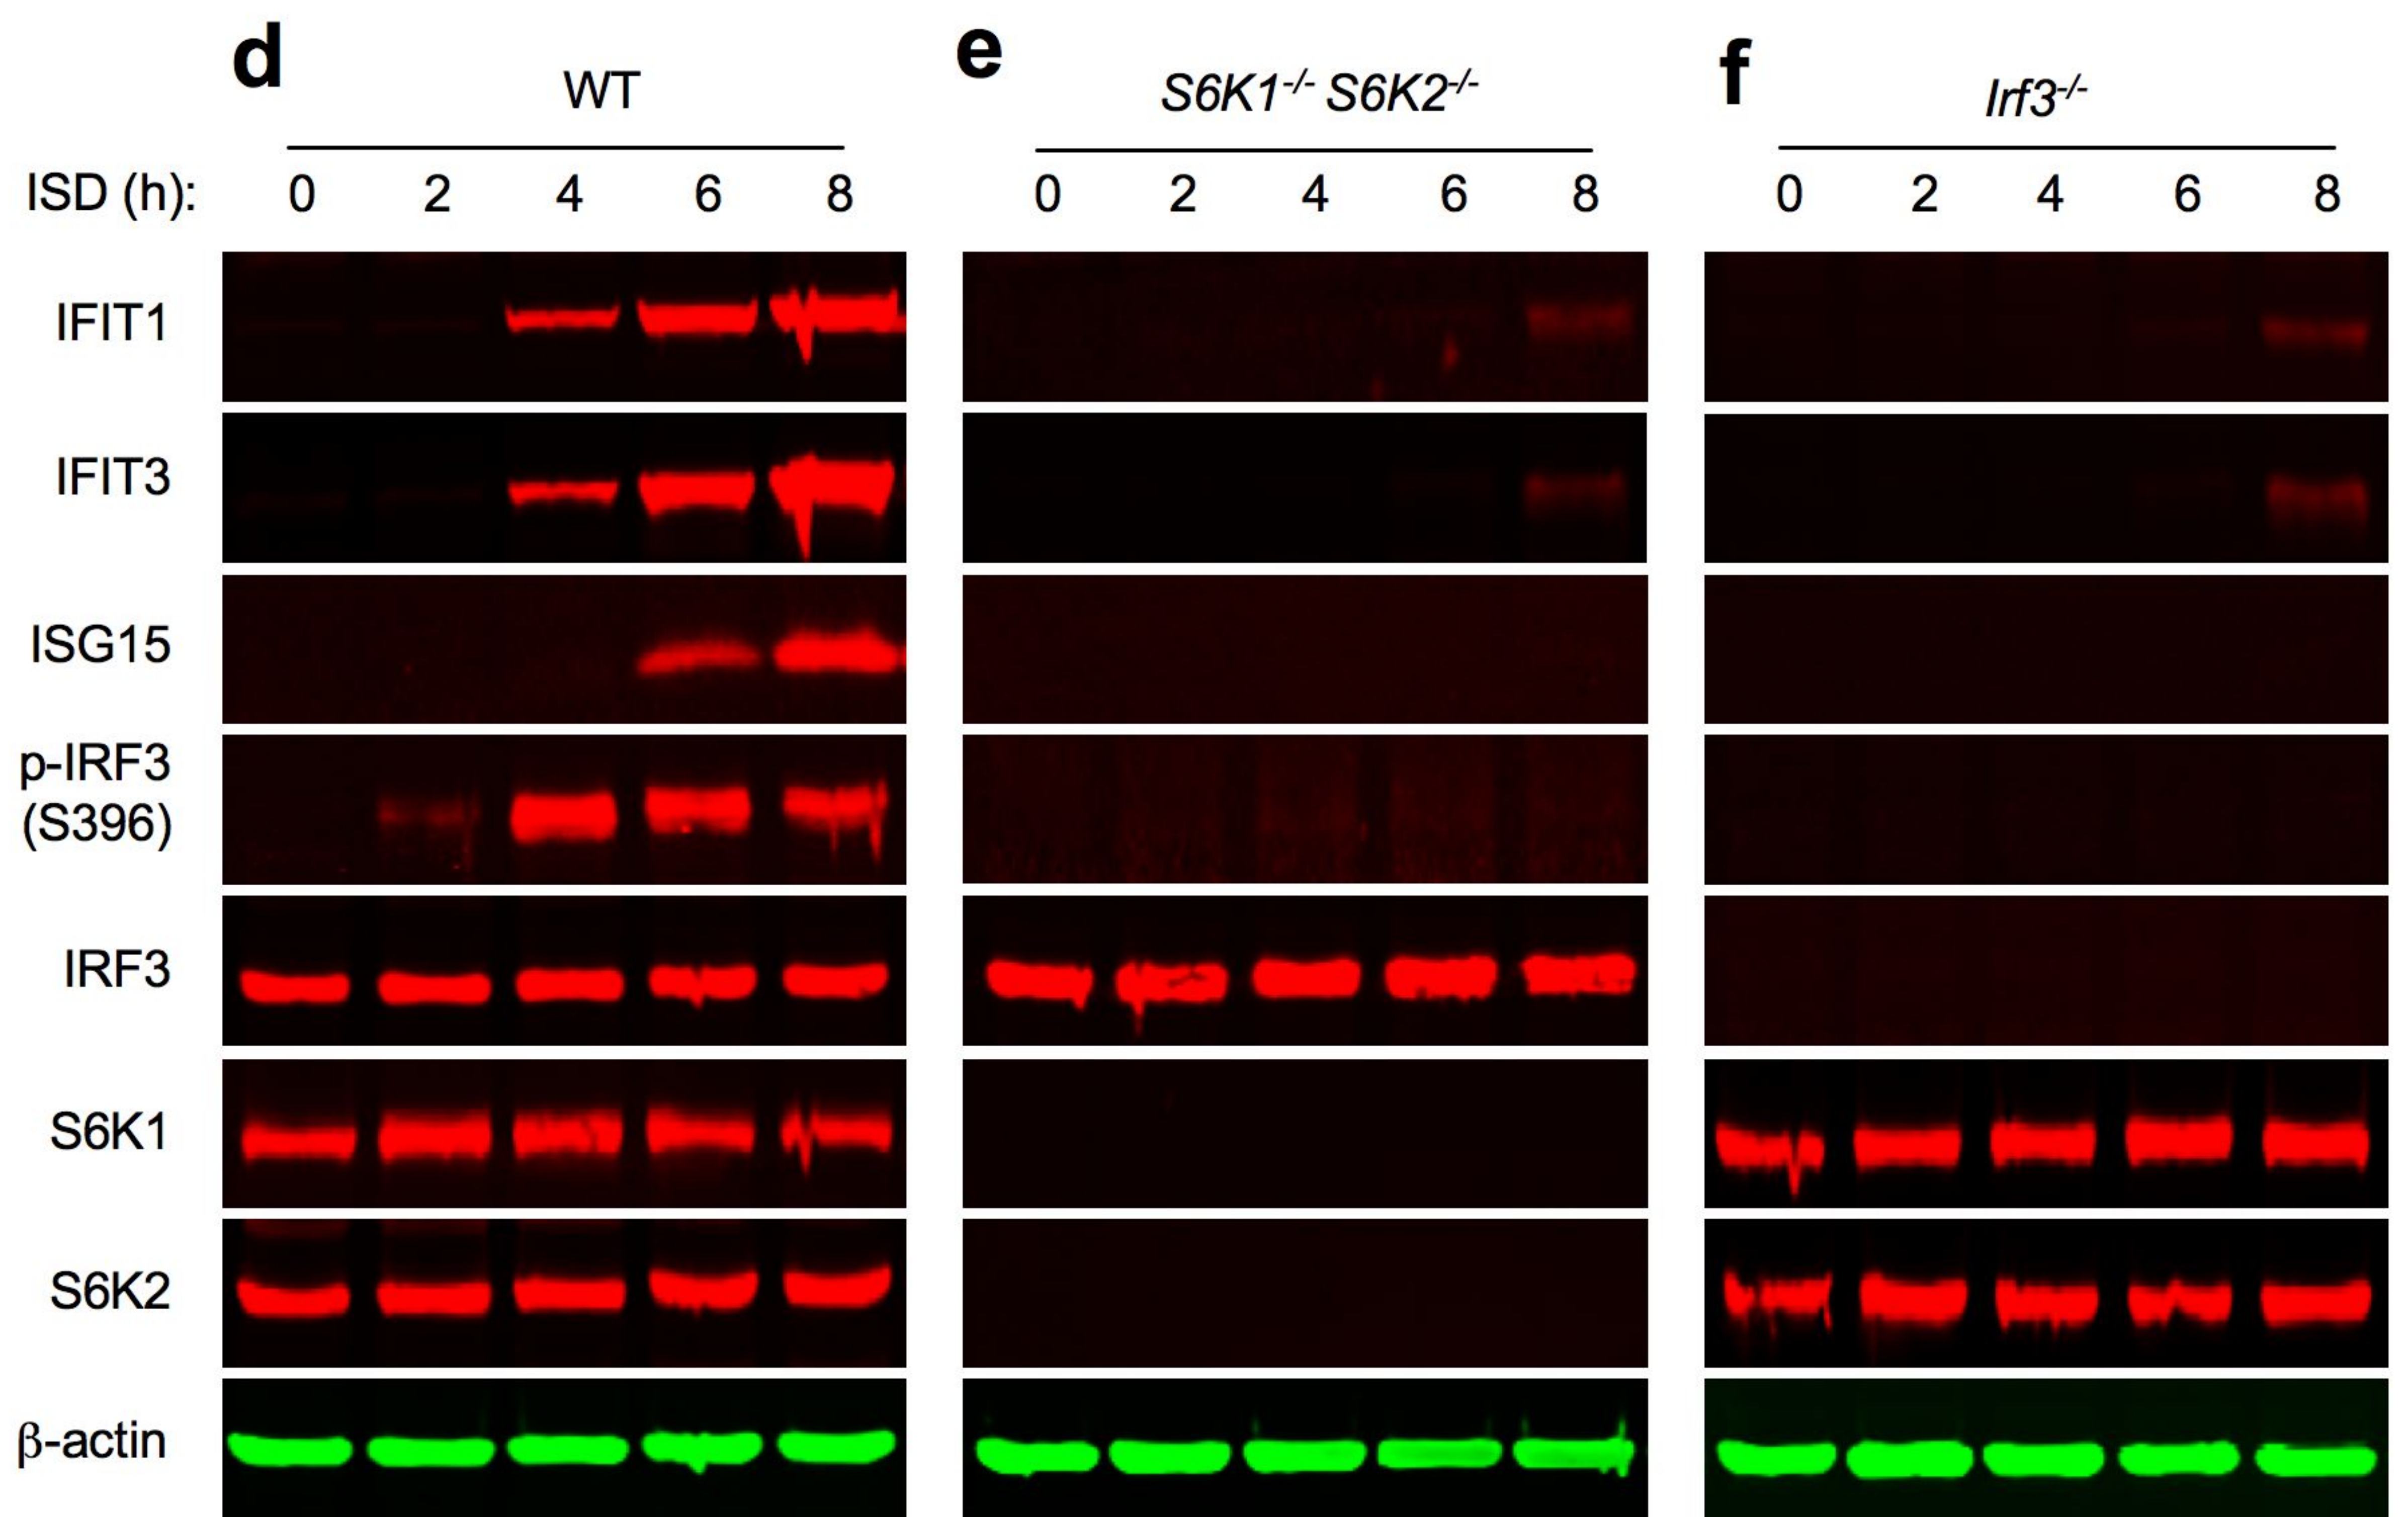

**Supplementary Figure 4a, b**

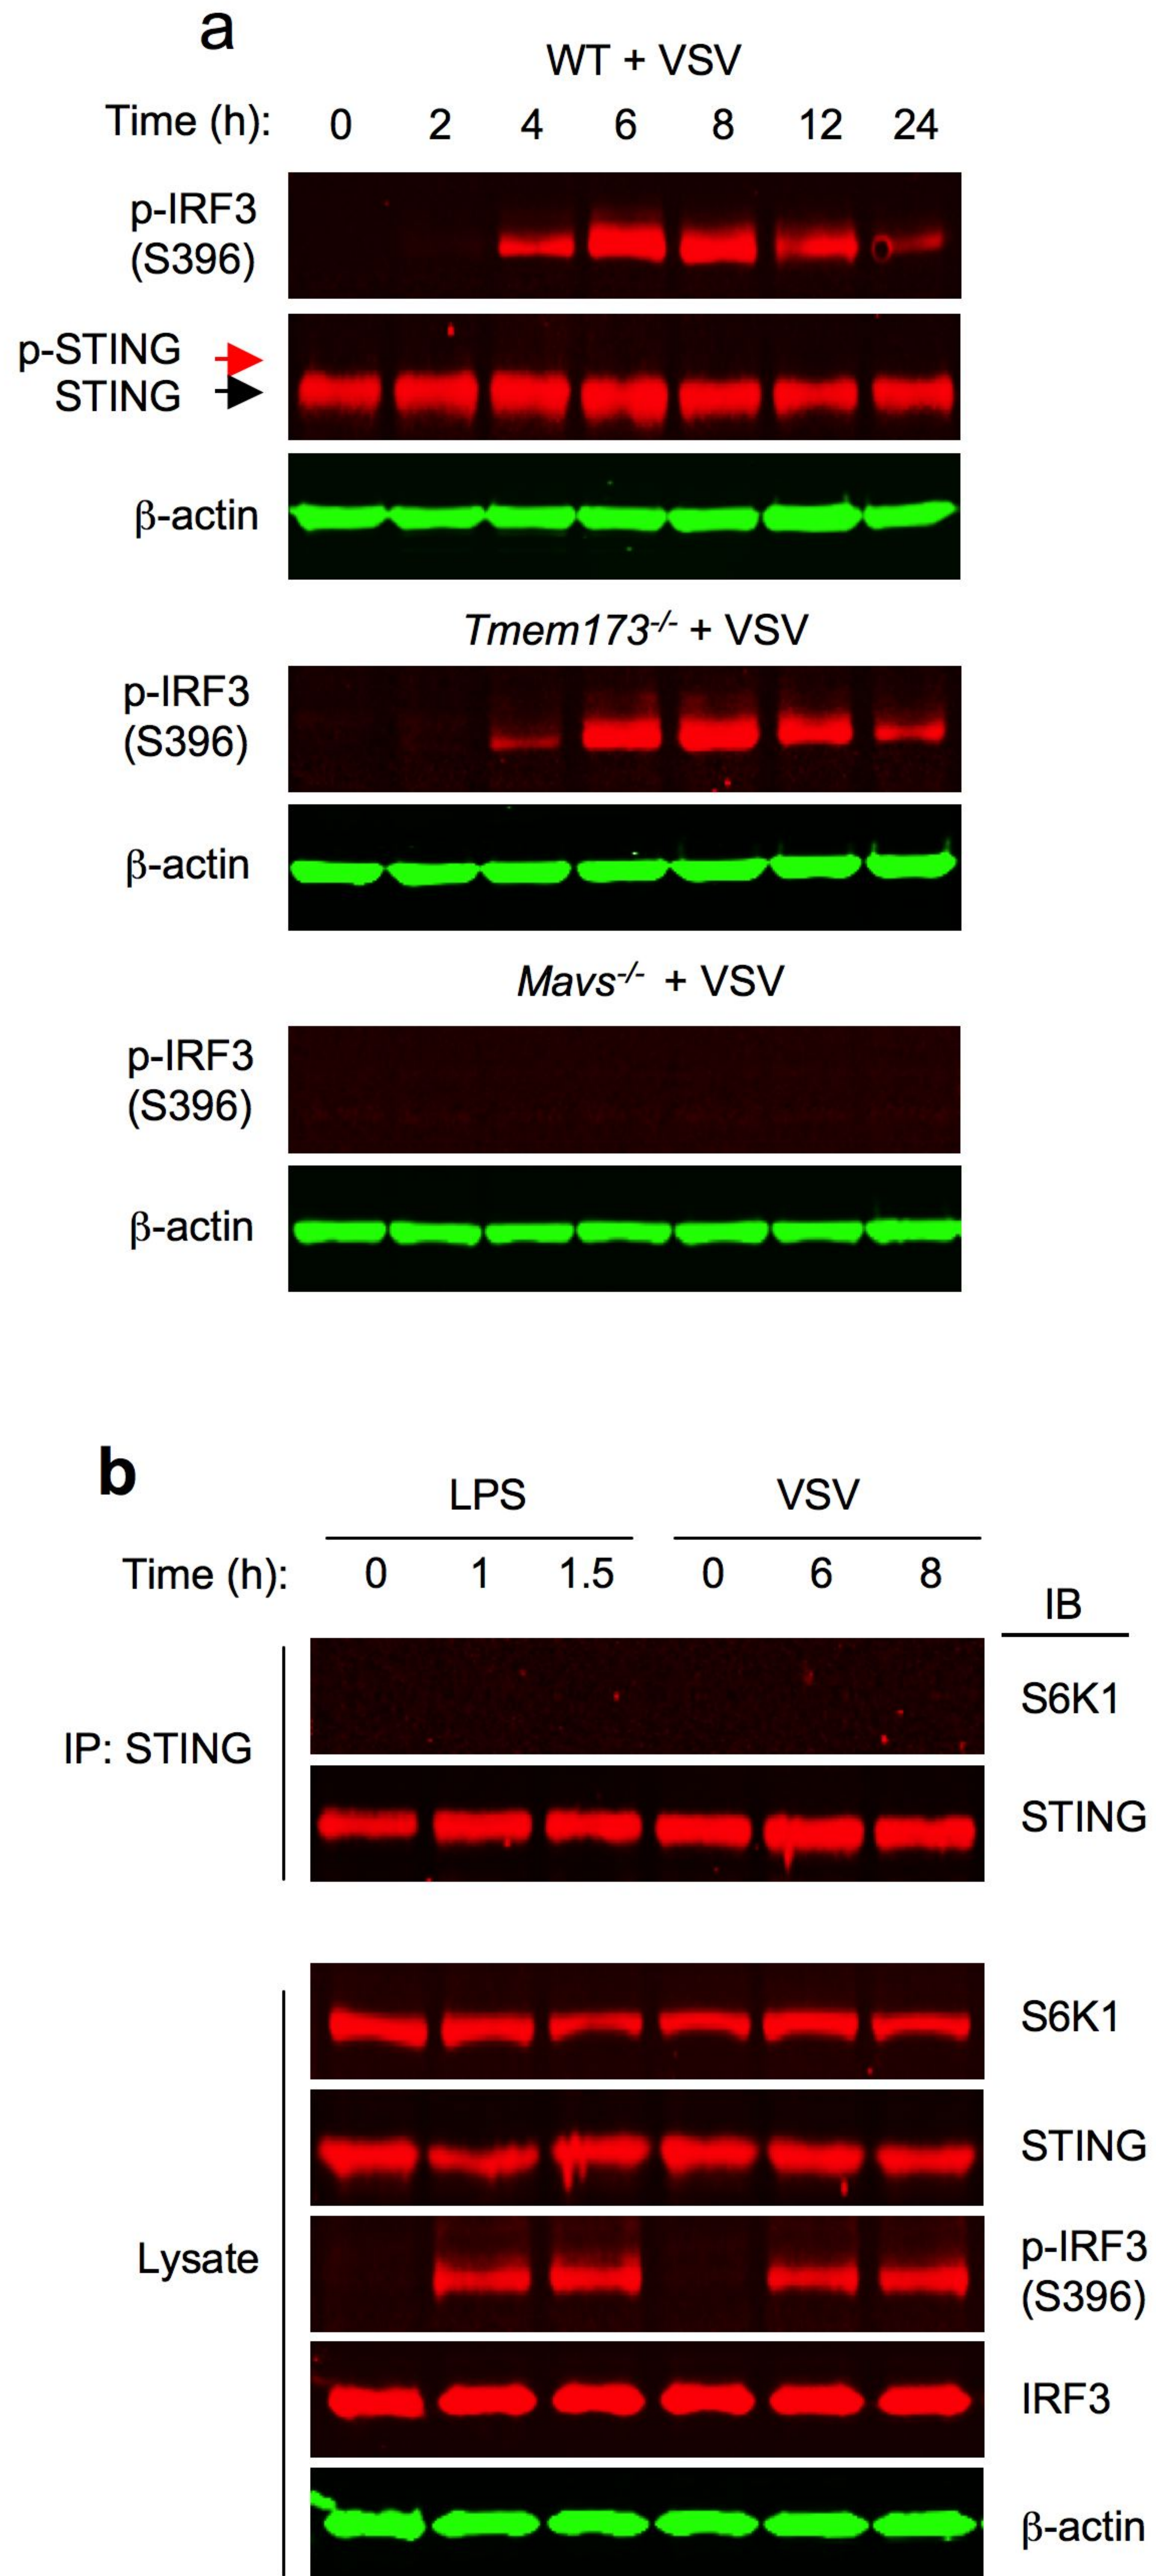

# Supplementary Figure 5a, b

**a**

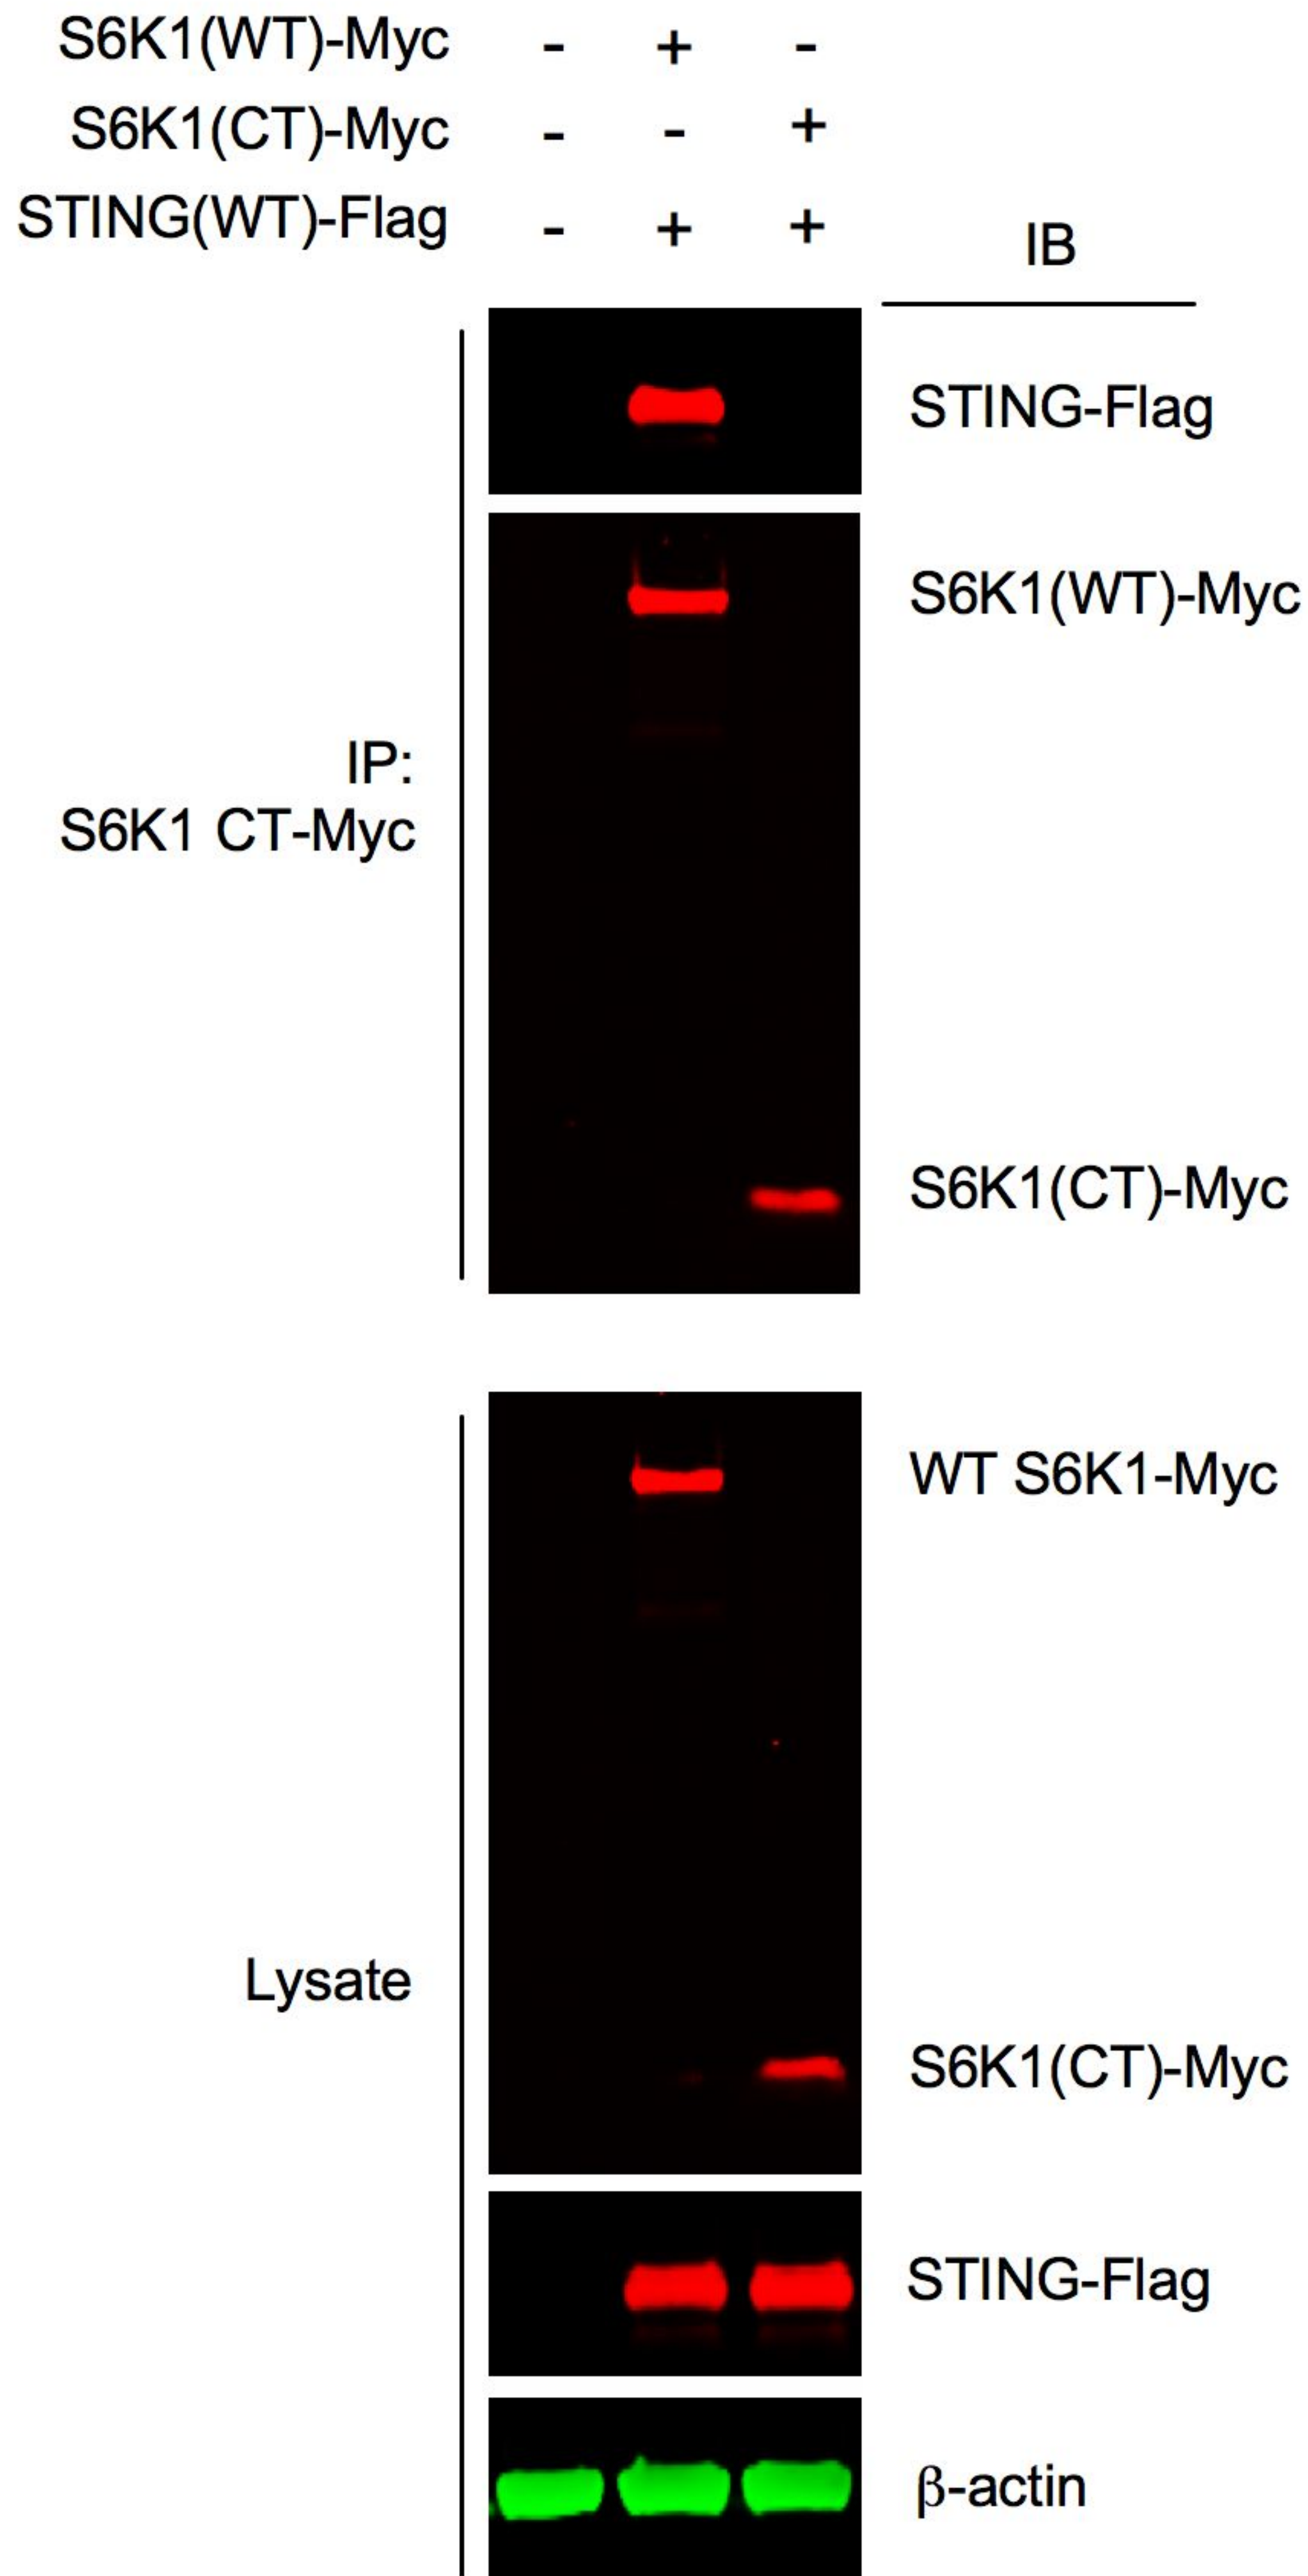

**b**

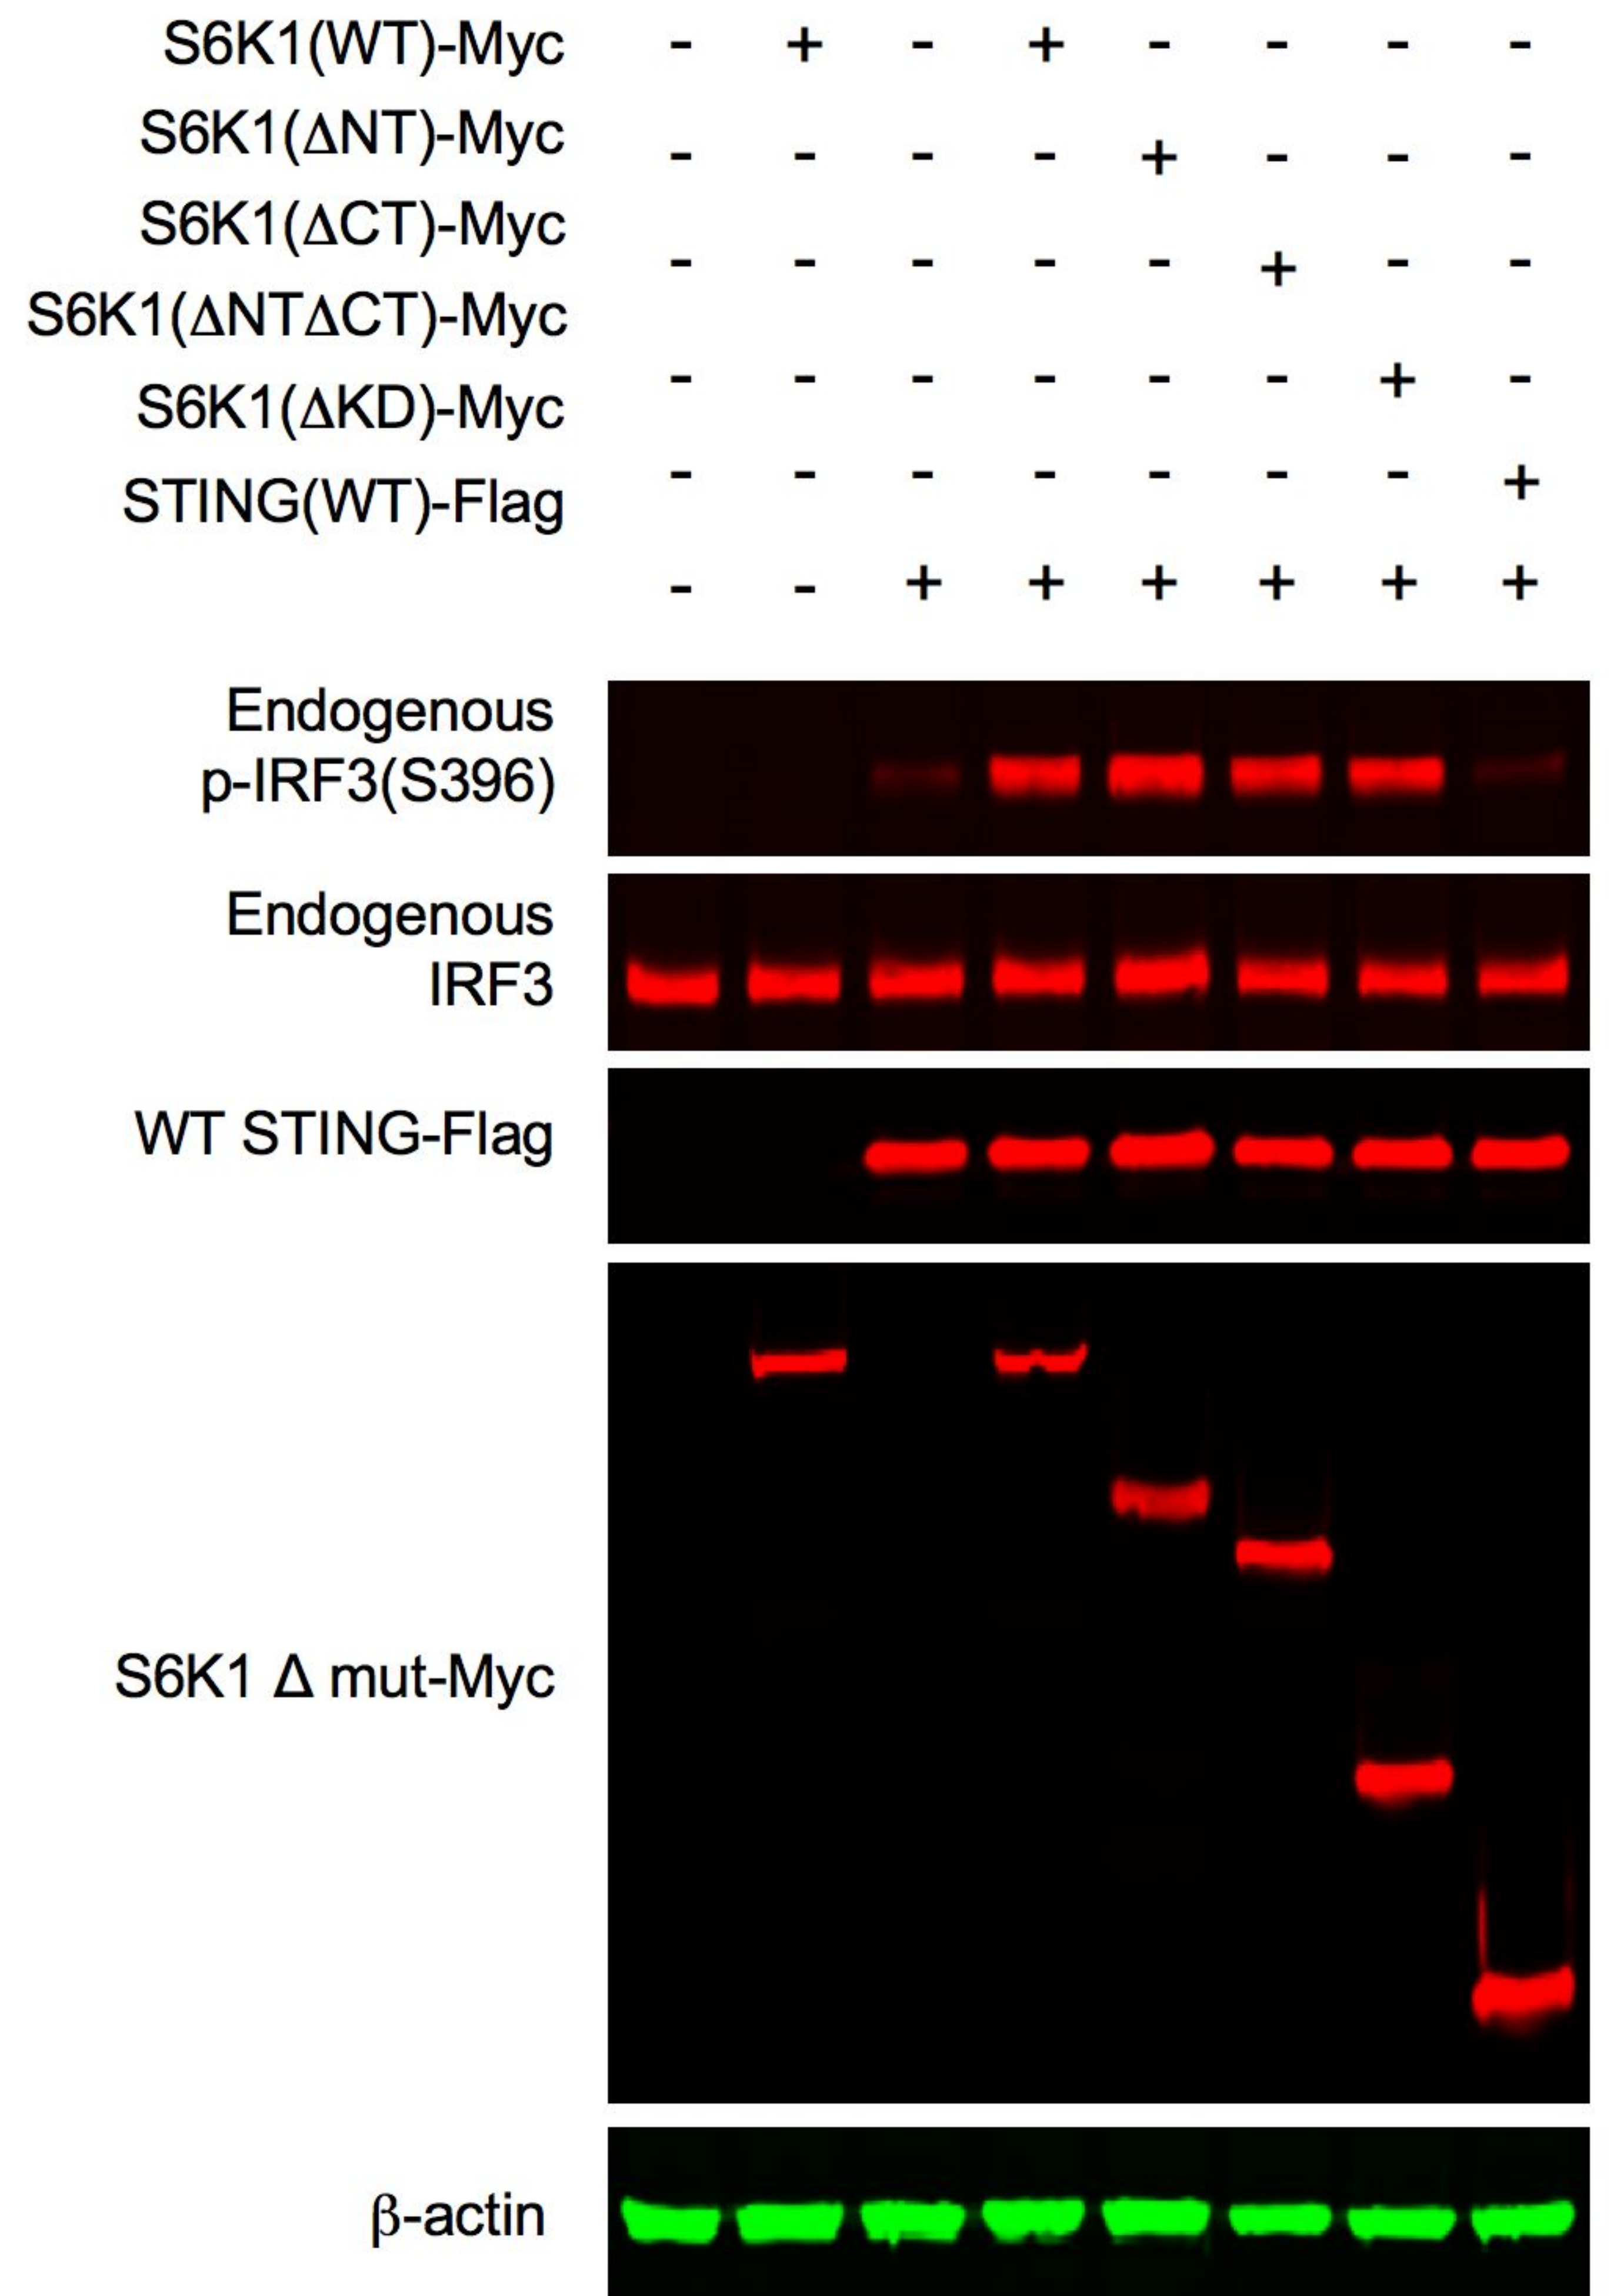

# Supplementary Figure 6

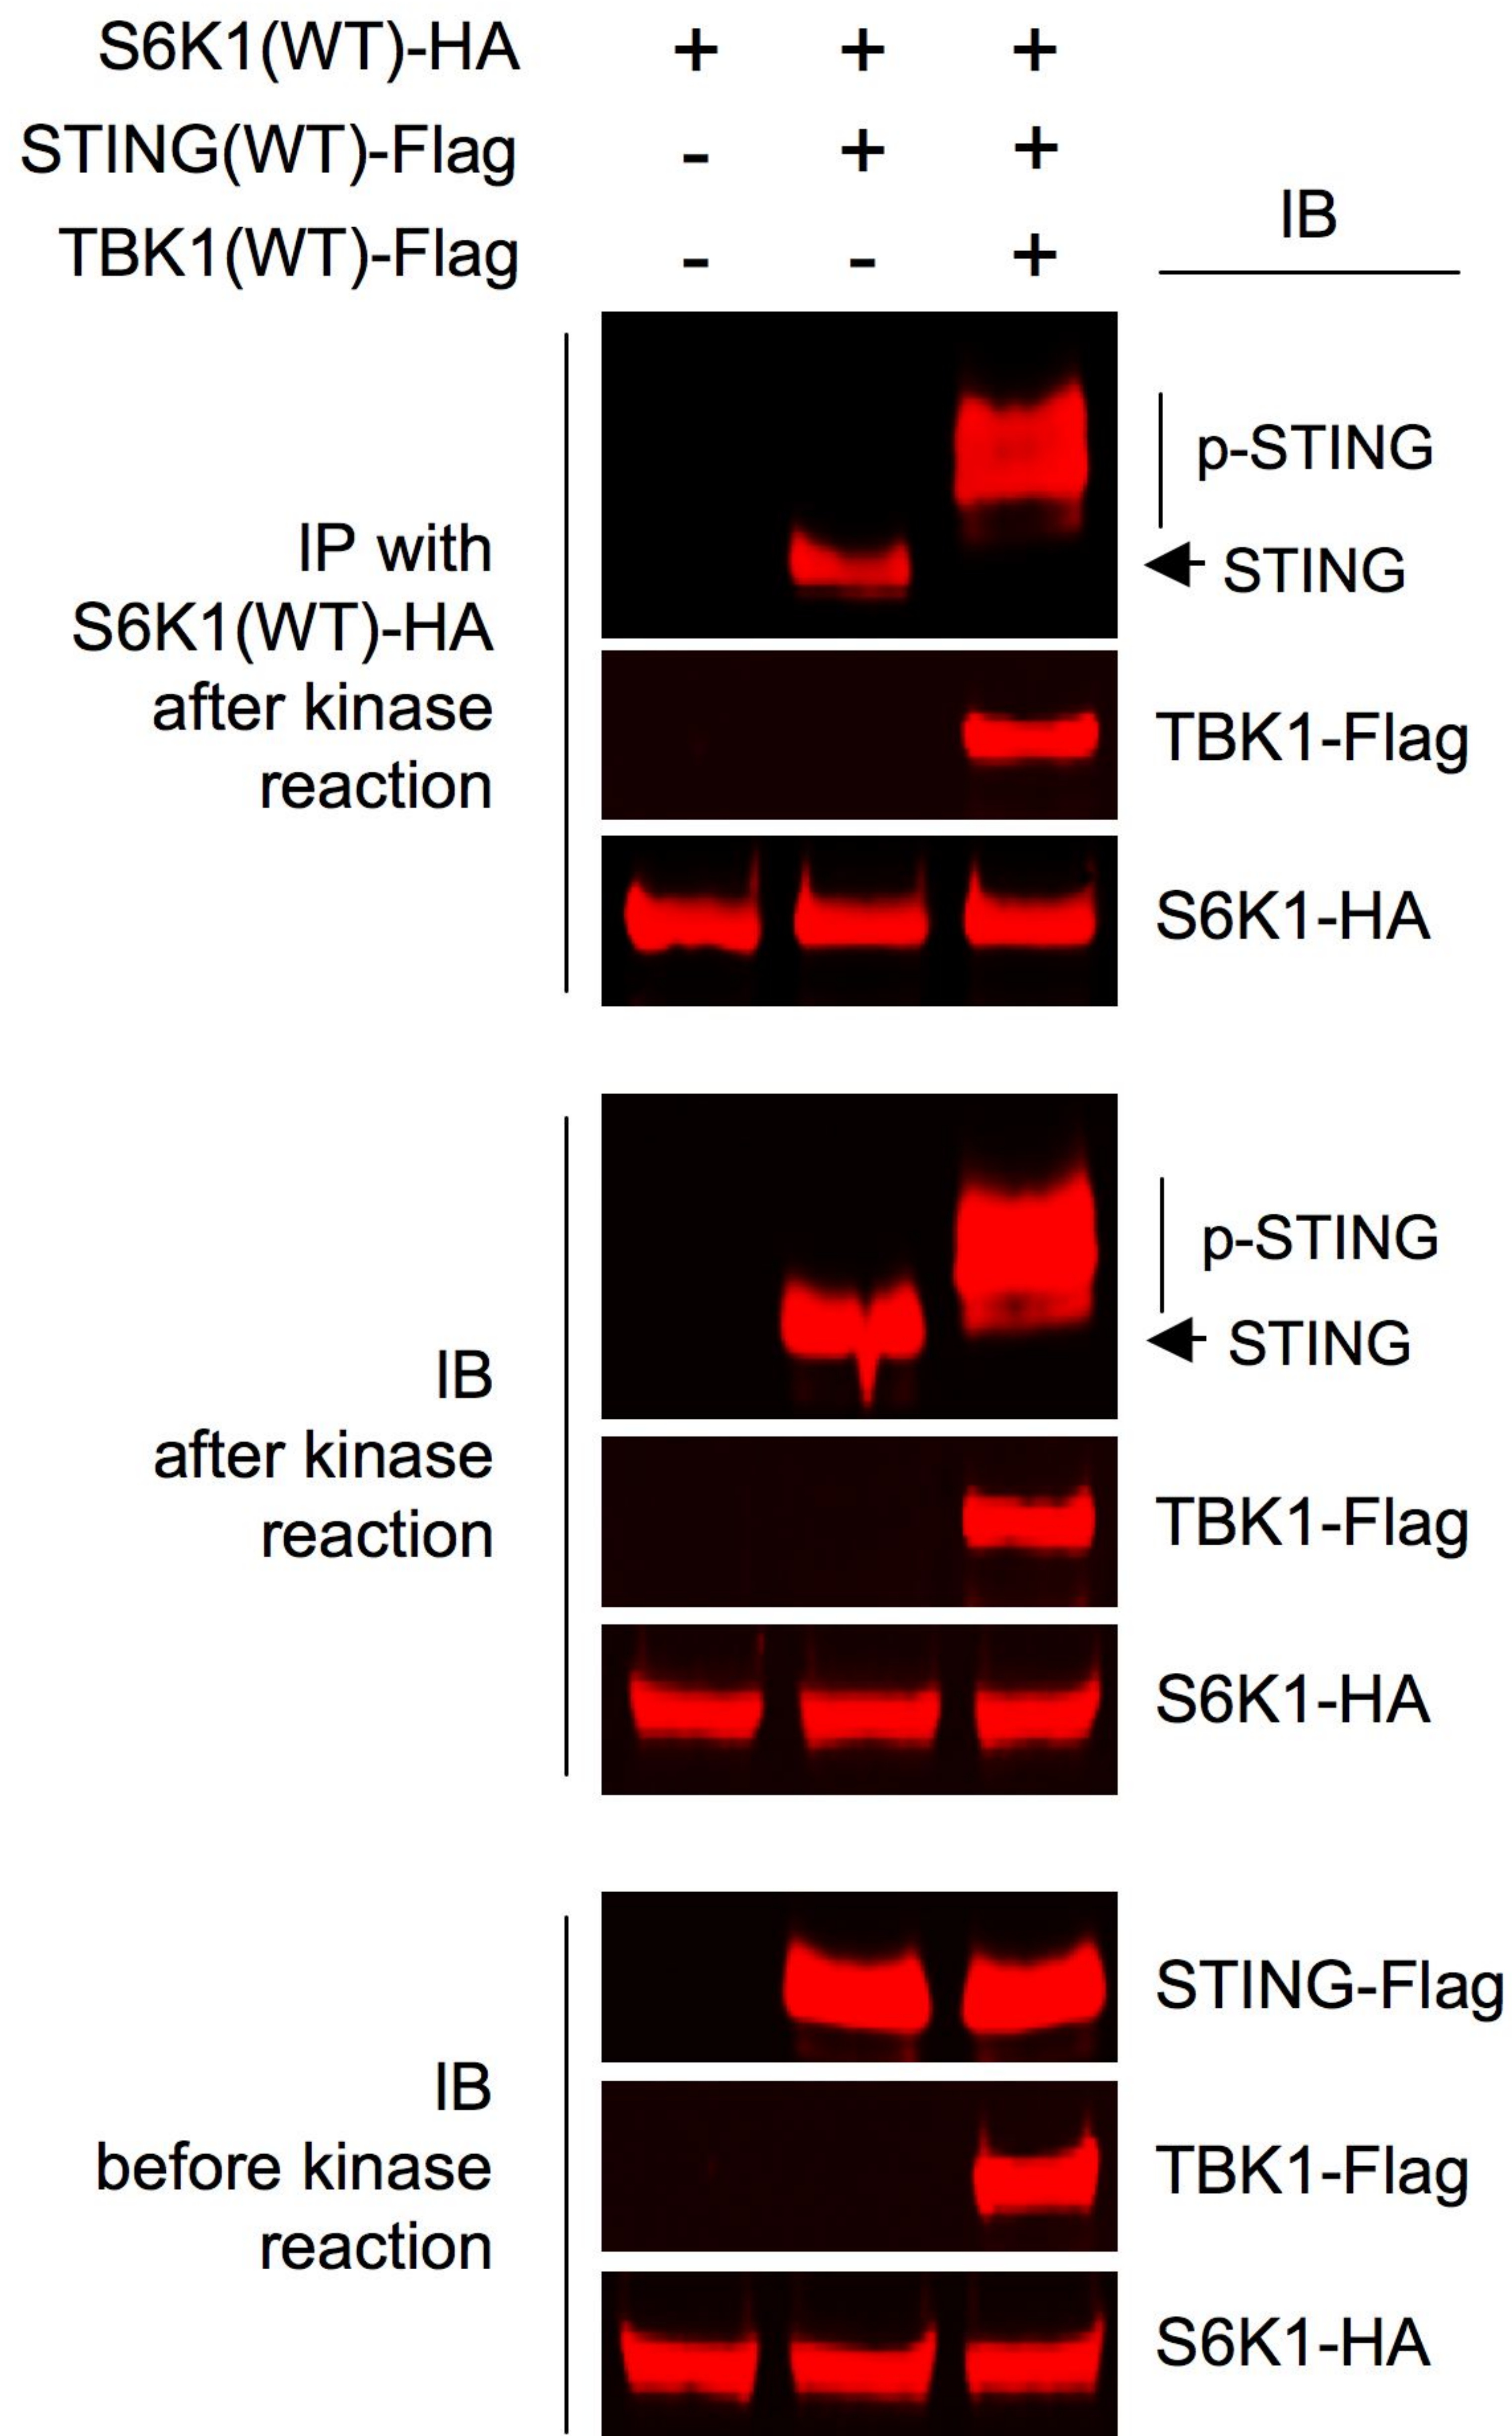

# Supplementary Figure 7a, b, c, d, e

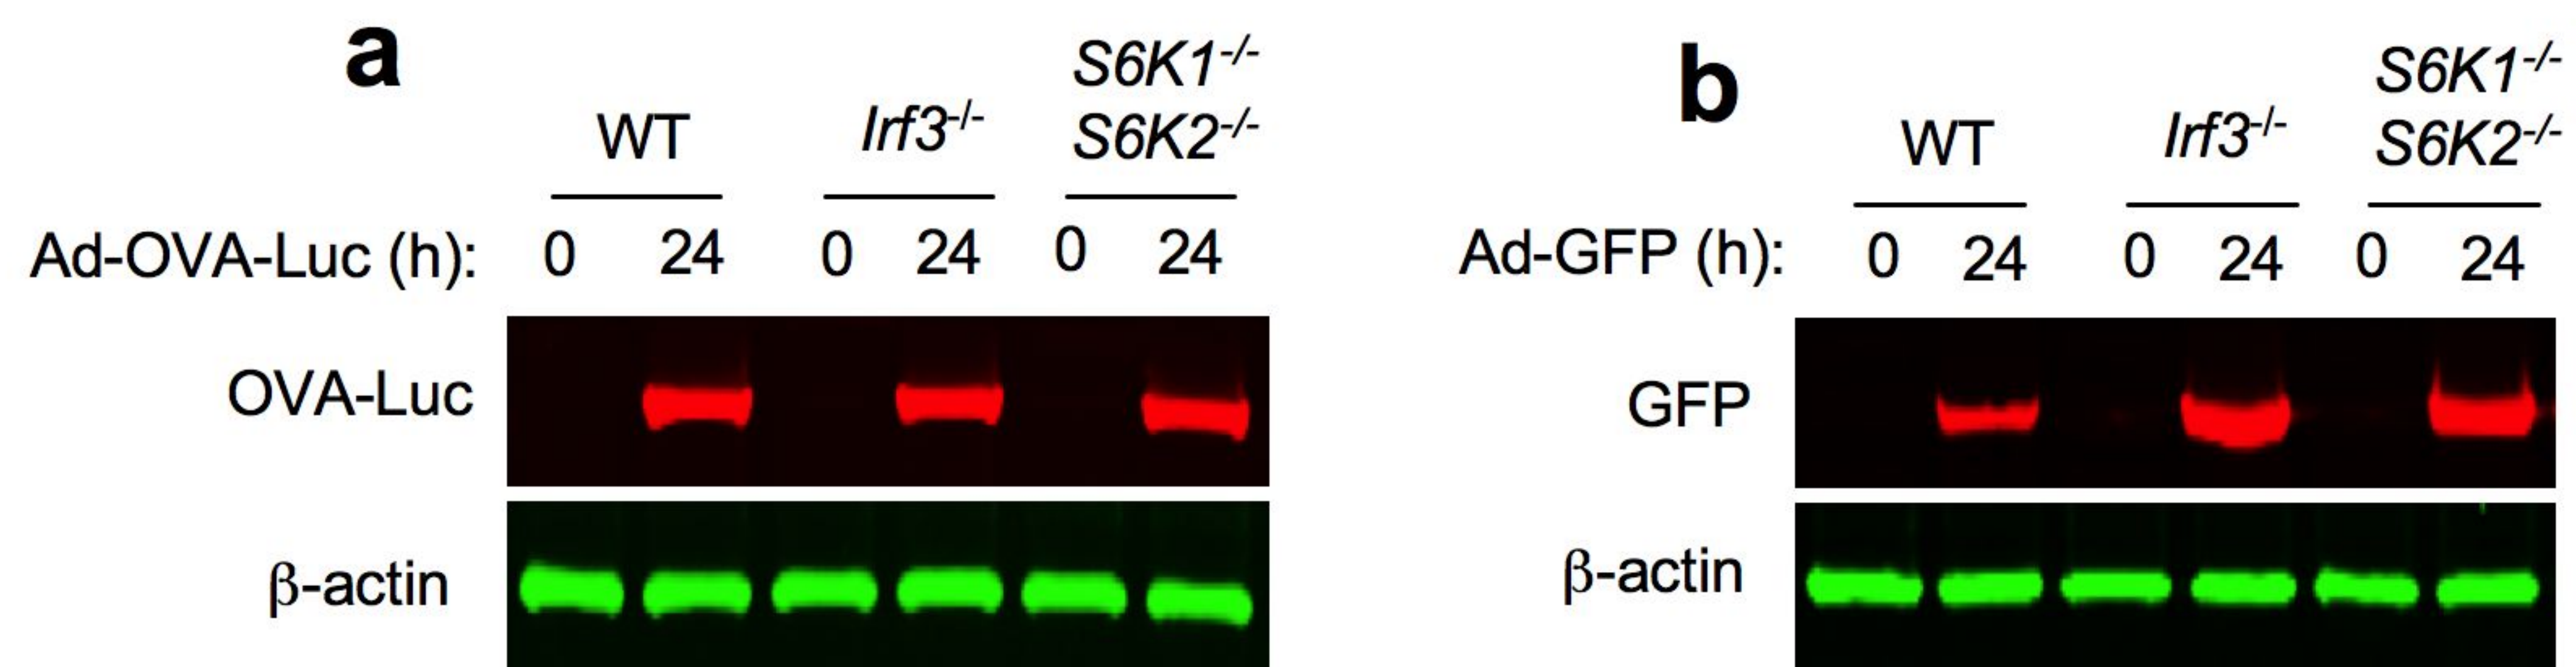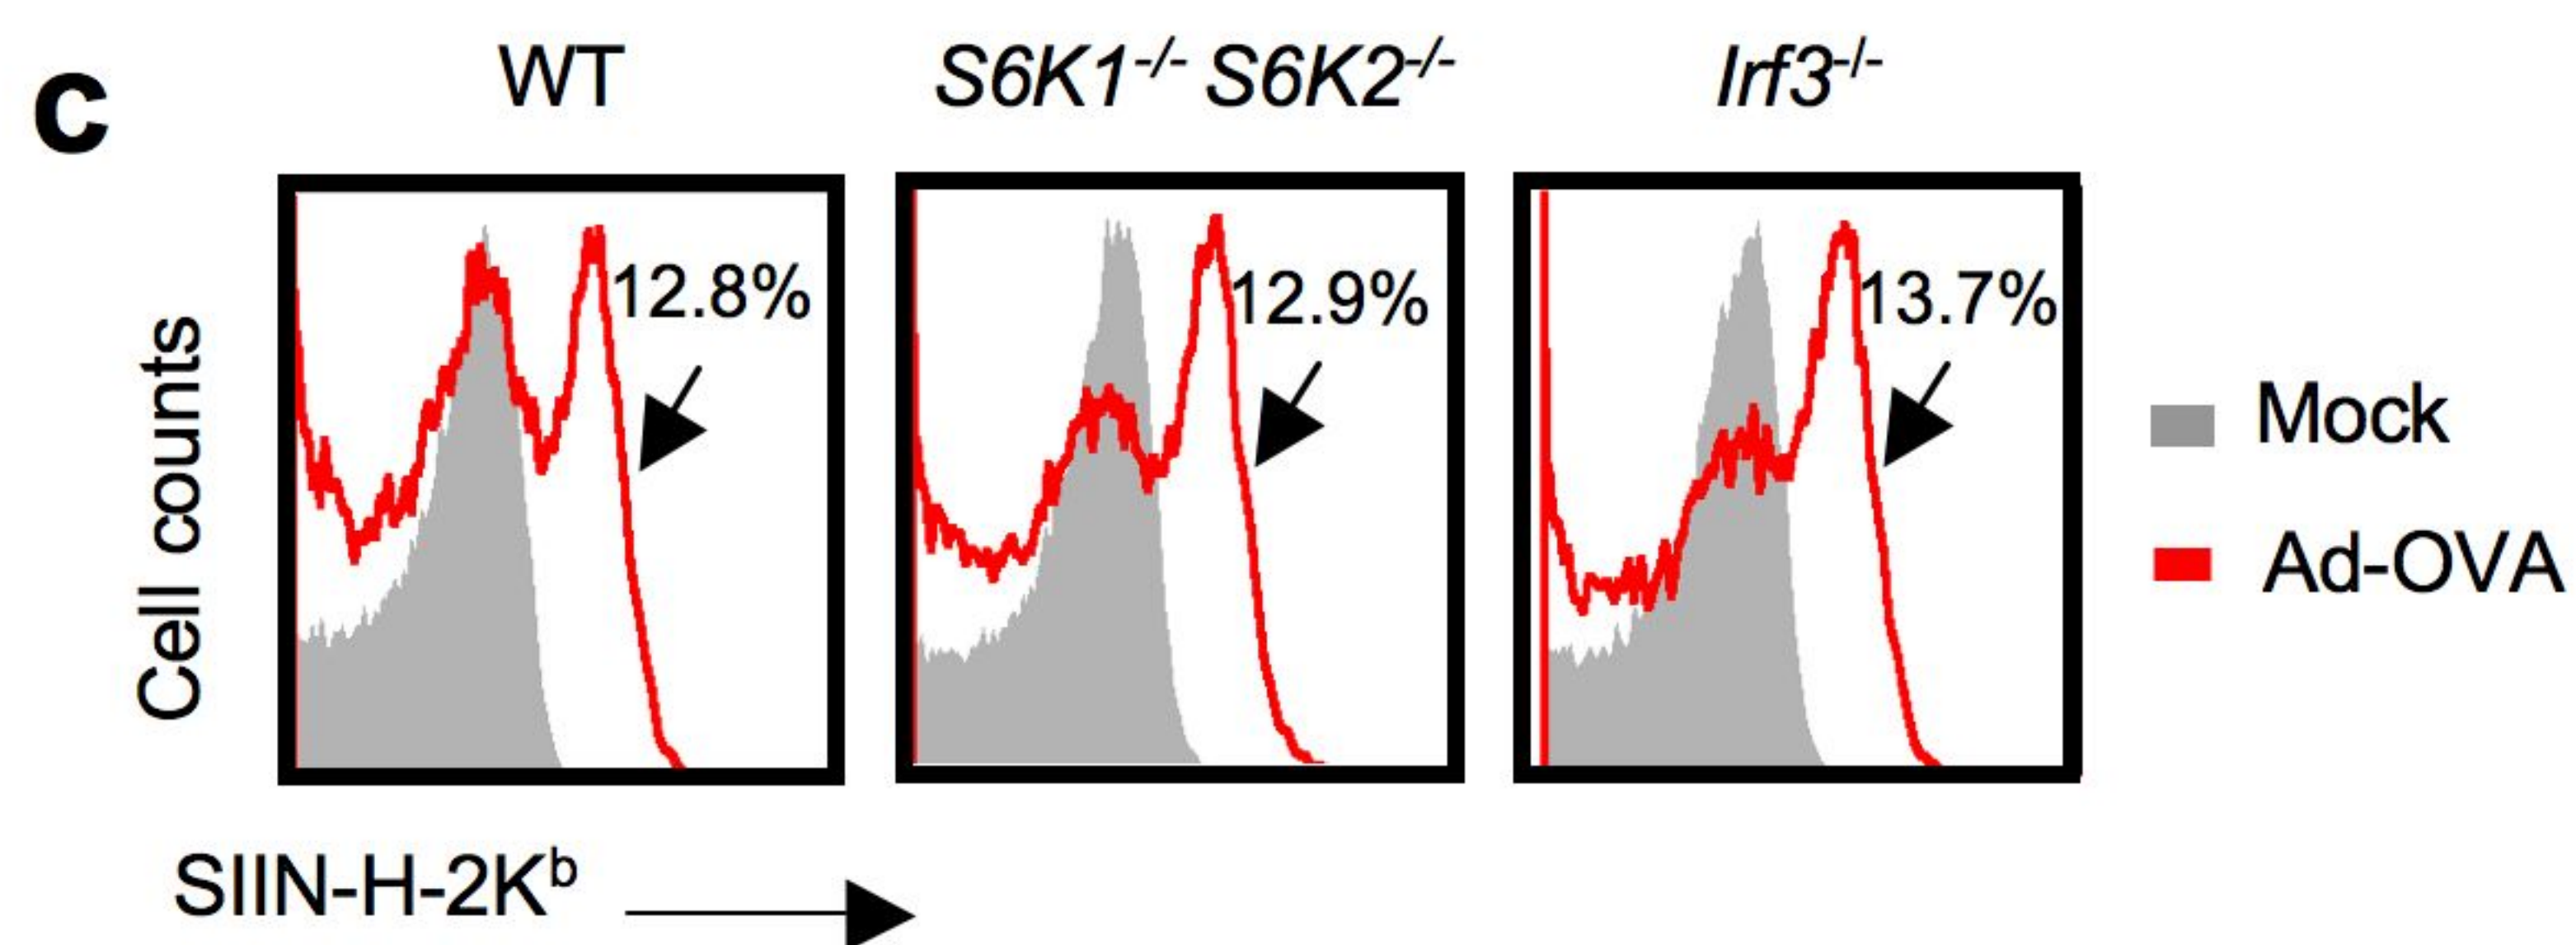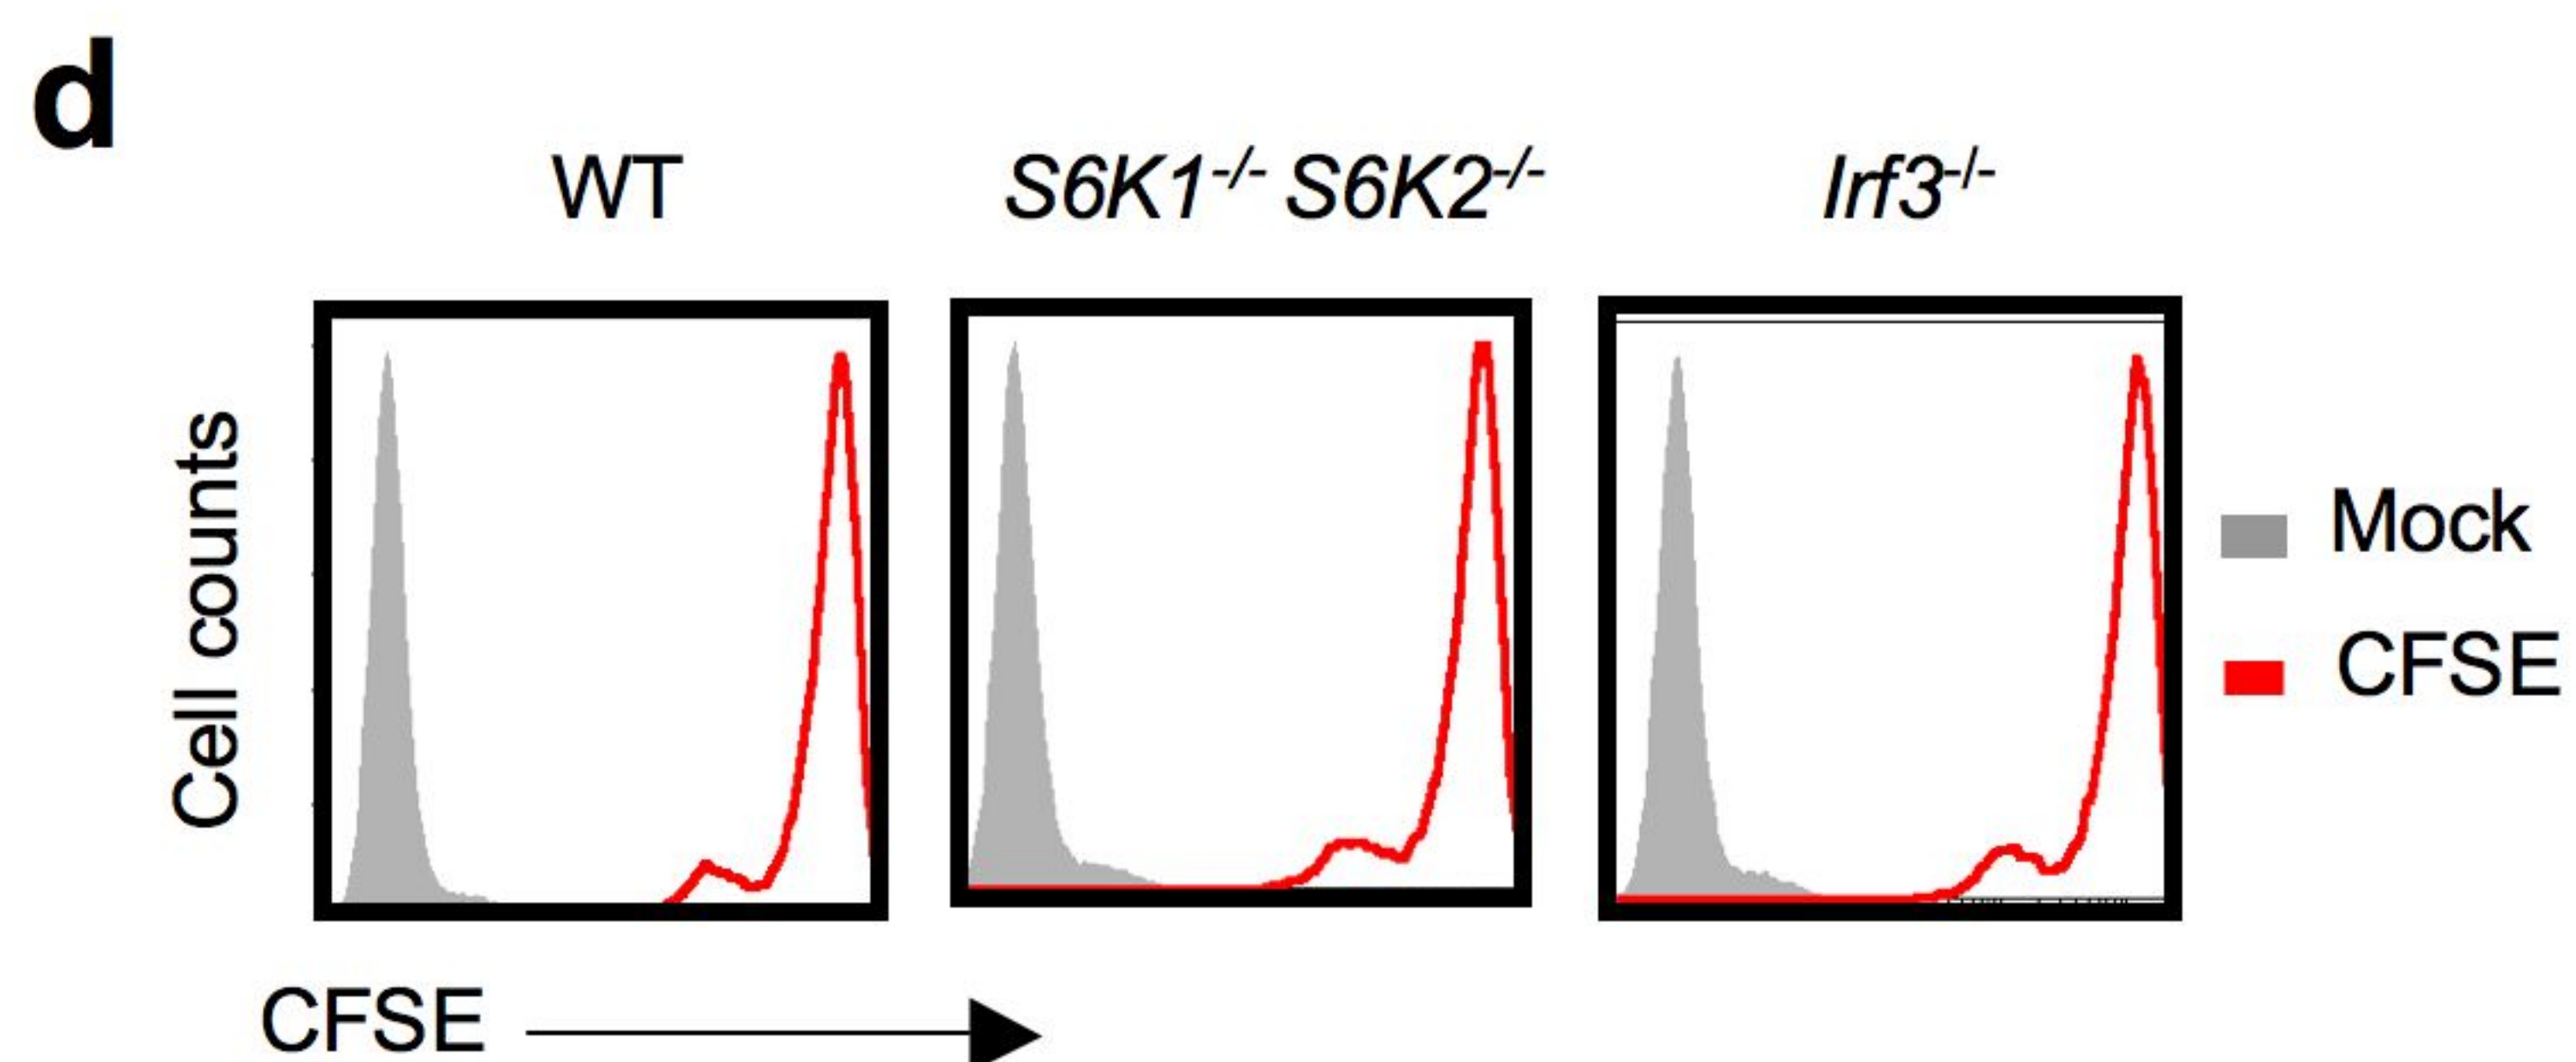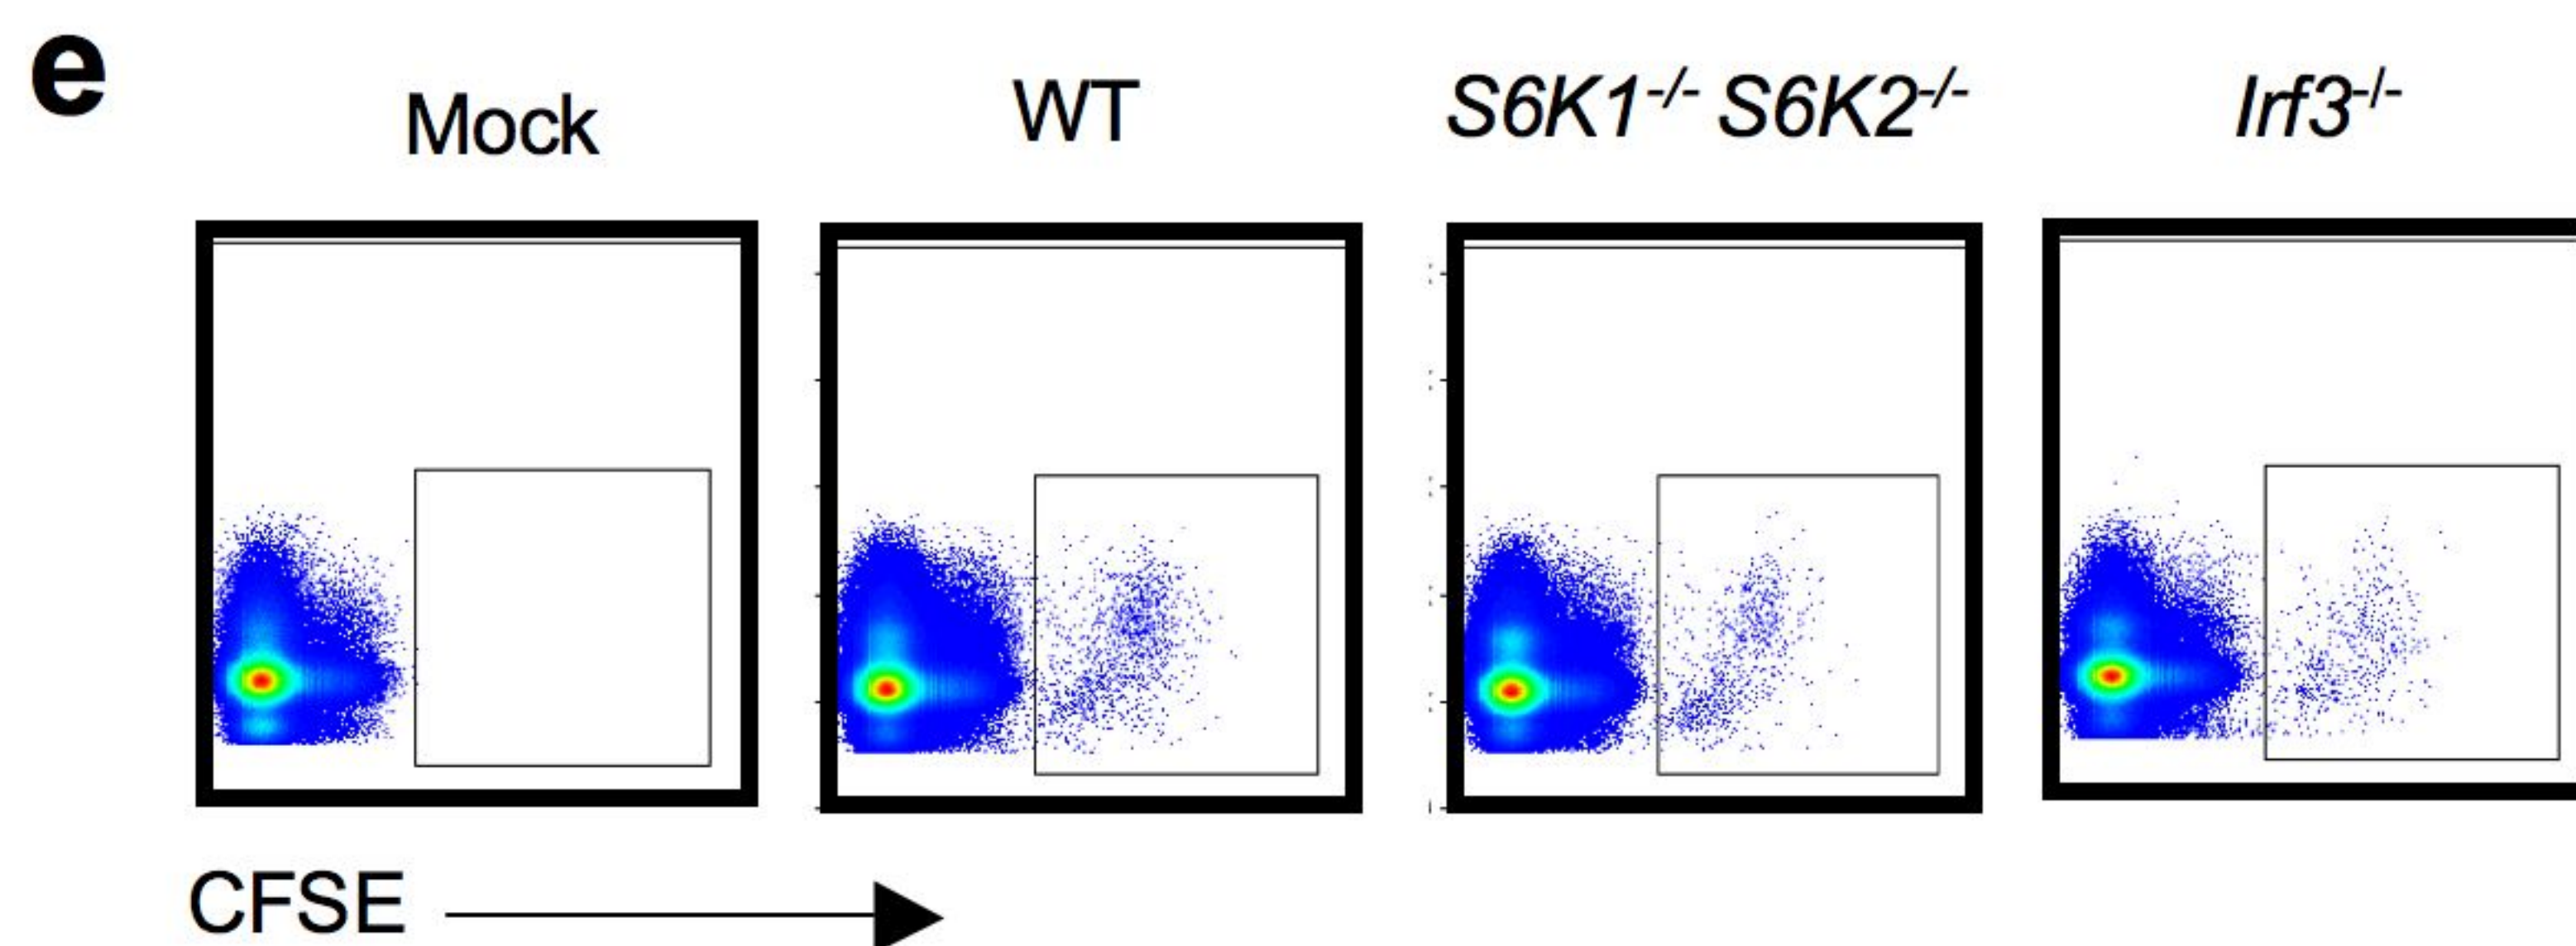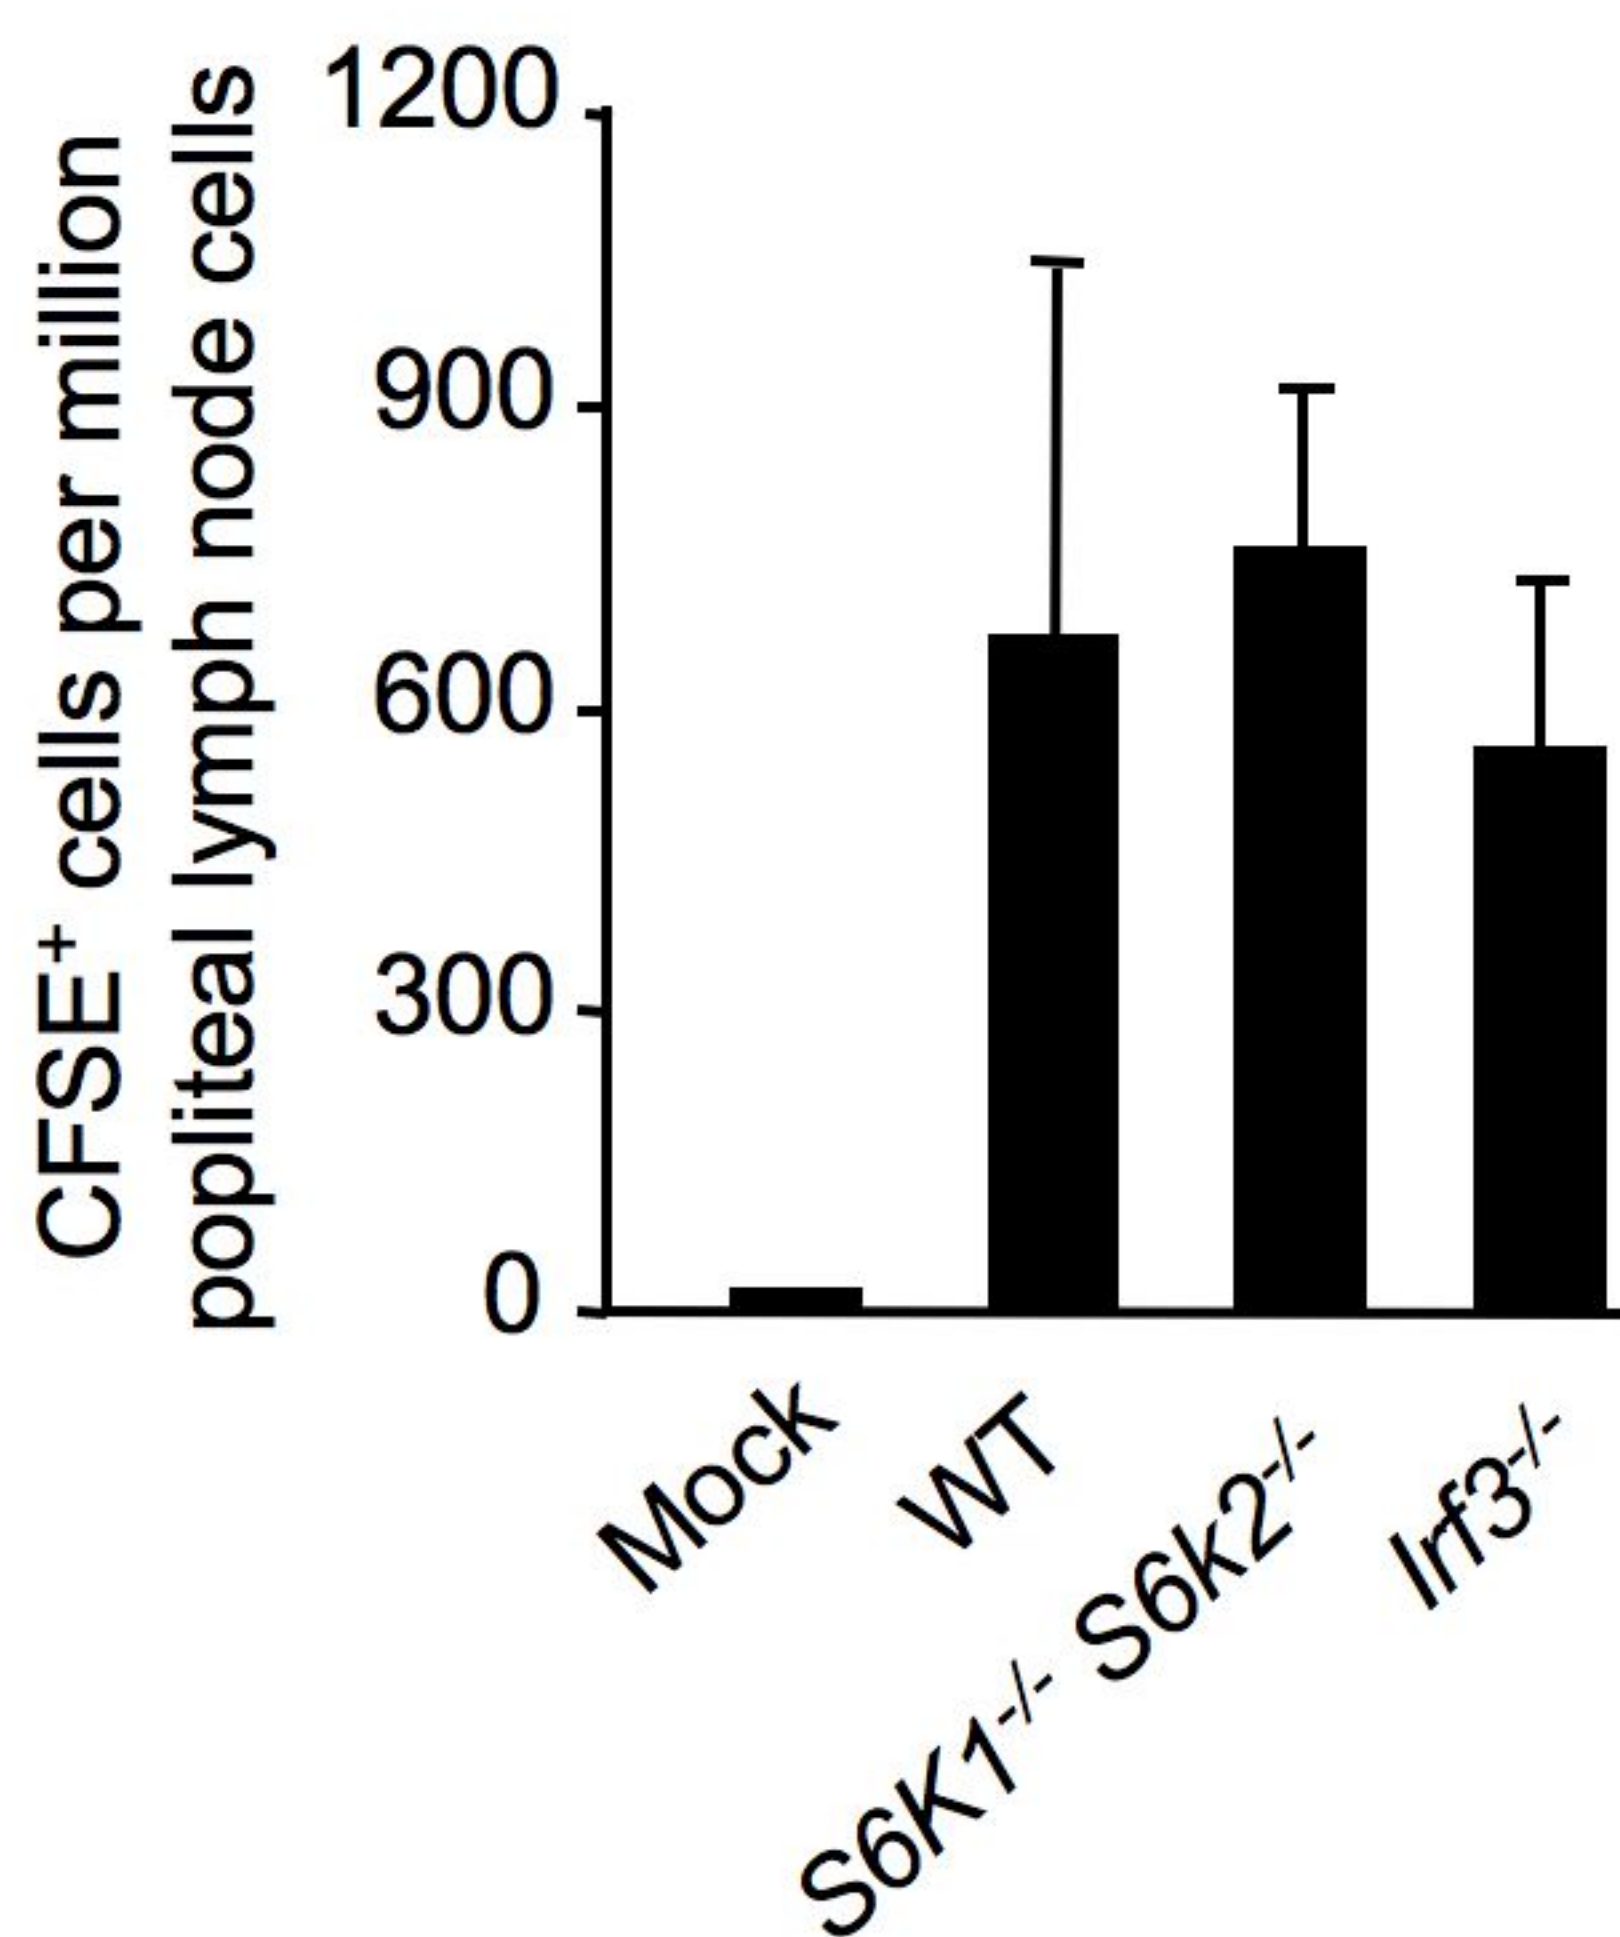

Supplement: NIHMS791862-supplement-01.pdf [file NIHMS791862-supplement-01.pdf]
